# Supplementary material for: Mathematical determination of the HIV-1 matrix shell structure and its impact on the biology of HIV-1
Source: PLoS One. 2019 Nov 12;14(11):e0224965. doi: 10.1371/journal.pone.0224965 (PMC6850549; doi:10.1371/journal.pone.0224965)
Supplement: S1 File — These particles were created in the software PyMol which uses Angstroms for units of distance, thus the initial range of radius distances were between 50.0 Å and 1059.2 Å (column A). Note that this radius was calculated to the center-of-mass of HIV-1 trimers. This distance was simply multiplied by two to calculate diameter in column B and converted to nm by multiplying the latter values by 0.1 (column C). The lipid bilayer was estimated to be 6 nm in width. To account for both sides of the sphere, this distance was multiplied by two and thus 12 nm was added to calculate the diameter including lipid bilayer width (column D). To calculate the final diameter of HIV-1 spheres, we also added the distance between the HIV-1 MA trimer center-of-mass to the inner surface of the lipid bilayer in column E. The number of MA trimers was obtained using the algorithms described in Materials and Methods to generate the data in column F. The number of MA monomers per HIV-1 particle was calculated by multiplying the values in column F by three (Column G). The data shown in Fig 6A and 6B were plotted from these data set. (XLSX) [file pone.0224965.s005.xlsx]

## Sheet: relationship_between_R&number_o
Radius of spheres to MA center-of-mass (Angstrom)	Diameter of sphere to MA center-of-mass (Angstrom)	Diameter to MA center-of-mass (nm)	Diameter including lipid bilayer width ( nm)	Diameter including distance from MA center-of-mass to inner surface of lipid bilayer (nm)	Number of MA trimers	number of MA monomers
50	100	10	22	24.8	4	12
50.1	100.2	10.02	22.02	24.82	4	12
50.2	100.4	10.04	22.04	24.84	4	12
50.3	100.6	10.06	22.06	24.86	4	12
50.4	100.8	10.08	22.08	24.88	4	12
50.5	101	10.1	22.1	24.9	4	12
50.6	101.2	10.12	22.12	24.92	4	12
50.7	101.4	10.14	22.14	24.94	4	12
50.8	101.6	10.16	22.16	24.96	4	12
50.9	101.8	10.18	22.18	24.98	4	12
51	102	10.2	22.2	25	4	12
51.1	102.2	10.22	22.22	25.02	4	12
51.2	102.4	10.24	22.24	25.04	4	12
51.3	102.6	10.26	22.26	25.06	4	12
51.4	102.8	10.28	22.28	25.08	4	12
51.5	103	10.3	22.3	25.1	4	12
51.6	103.2	10.32	22.32	25.12	4	12
51.7	103.4	10.34	22.34	25.14	4	12
51.8	103.6	10.36	22.36	25.16	4	12
51.9	103.8	10.38	22.38	25.18	4	12
52	104	10.4	22.4	25.2	4	12
52.1	104.2	10.42	22.42	25.22	4	12
52.2	104.4	10.44	22.44	25.24	4	12
52.3	104.6	10.46	22.46	25.26	4	12
52.4	104.8	10.48	22.48	25.28	4	12
52.5	105	10.5	22.5	25.3	4	12
52.6	105.2	10.52	22.52	25.32	4	12
52.7	105.4	10.54	22.54	25.34	4	12
52.8	105.6	10.56	22.56	25.36	4	12
52.9	105.8	10.58	22.58	25.38	4	12
53	106	10.6	22.6	25.4	4	12
53.1	106.2	10.62	22.62	25.42	4	12
53.2	106.4	10.64	22.64	25.44	4	12
53.3	106.6	10.66	22.66	25.46	4	12
53.4	106.8	10.68	22.68	25.48	4	12
53.5	107	10.7	22.7	25.5	4	12
53.6	107.2	10.72	22.72	25.52	4	12
53.7	107.4	10.74	22.74	25.54	4	12
53.8	107.6	10.76	22.76	25.56	4	12
53.9	107.8	10.78	22.78	25.58	4	12
54	108	10.8	22.8	25.6	4	12
54.1	108.2	10.82	22.82	25.62	4	12
54.2	108.4	10.84	22.84	25.64	4	12
54.3	108.6	10.86	22.86	25.66	4	12
54.4	108.8	10.88	22.88	25.68	4	12
54.5	109	10.9	22.9	25.7	4	12
54.6	109.2	10.92	22.92	25.72	4	12
54.7	109.4	10.94	22.94	25.74	4	12
54.8	109.6	10.96	22.96	25.76	4	12
54.9	109.8	10.98	22.98	25.78	4	12
55	110	11	23	25.8	4	12
55.1	110.2	11.02	23.02	25.82	4	12
55.2	110.4	11.04	23.04	25.84	4	12
55.3	110.6	11.06	23.06	25.86	4	12
55.4	110.8	11.08	23.08	25.88	4	12
55.5	111	11.1	23.1	25.9	4	12
55.6	111.2	11.12	23.12	25.92	4	12
55.7	111.4	11.14	23.14	25.94	4	12
55.8	111.6	11.16	23.16	25.96	4	12
55.9	111.8	11.18	23.18	25.98	4	12
56	112	11.2	23.2	26	4	12
56.1	112.2	11.22	23.22	26.02	4	12
56.2	112.4	11.24	23.24	26.04	4	12
56.3	112.6	11.26	23.26	26.06	4	12
56.4	112.8	11.28	23.28	26.08	4	12
56.5	113	11.3	23.3	26.1	4	12
56.6	113.2	11.32	23.32	26.12	4	12
56.7	113.4	11.34	23.34	26.14	4	12
56.8	113.6	11.36	23.36	26.16	4	12
56.9	113.8	11.38	23.38	26.18	8	24
57	114	11.4	23.4	26.2	8	24
57.1	114.2	11.42	23.42	26.22	9	27
57.2	114.4	11.44	23.44	26.24	9	27
57.3	114.6	11.46	23.46	26.26	9	27
57.4	114.8	11.48	23.48	26.28	9	27
57.5	115	11.5	23.5	26.3	9	27
57.6	115.2	11.52	23.52	26.32	9	27
57.7	115.4	11.54	23.54	26.34	9	27
57.8	115.6	11.56	23.56	26.36	9	27
57.9	115.8	11.58	23.58	26.38	9	27
58	116	11.6	23.6	26.4	9	27
58.1	116.2	11.62	23.62	26.42	9	27
58.2	116.4	11.64	23.64	26.44	9	27
58.3	116.6	11.66	23.66	26.46	9	27
58.4	116.8	11.68	23.68	26.48	9	27
58.5	117	11.7	23.7	26.5	9	27
58.6	117.2	11.72	23.72	26.52	9	27
58.7	117.4	11.74	23.74	26.54	9	27
58.8	117.6	11.76	23.76	26.56	9	27
58.9	117.8	11.78	23.78	26.58	9	27
59	118	11.8	23.8	26.6	9	27
59.1	118.2	11.82	23.82	26.62	9	27
59.2	118.4	11.84	23.84	26.64	9	27
59.3	118.6	11.86	23.86	26.66	9	27
59.4	118.8	11.88	23.88	26.68	9	27
59.5	119	11.9	23.9	26.7	9	27
59.6	119.2	11.92	23.92	26.72	9	27
59.7	119.4	11.94	23.94	26.74	9	27
59.8	119.6	11.96	23.96	26.76	9	27
59.9	119.8	11.98	23.98	26.78	9	27
60	120	12	24	26.8	9	27
60.1	120.2	12.02	24.02	26.82	9	27
60.2	120.4	12.04	24.04	26.84	9	27
60.3	120.6	12.06	24.06	26.86	9	27
60.4	120.8	12.08	24.08	26.88	9	27
60.5	121	12.1	24.1	26.9	9	27
60.6	121.2	12.12	24.12	26.92	9	27
60.7	121.4	12.14	24.14	26.94	9	27
60.8	121.6	12.16	24.16	26.96	9	27
60.9	121.8	12.18	24.18	26.98	9	27
61	122	12.2	24.2	27	9	27
61.1	122.2	12.22	24.22	27.02	9	27
61.2	122.4	12.24	24.24	27.04	9	27
61.3	122.6	12.26	24.26	27.06	9	27
61.4	122.8	12.28	24.28	27.08	9	27
61.5	123	12.3	24.3	27.1	9	27
61.6	123.2	12.32	24.32	27.12	9	27
61.7	123.4	12.34	24.34	27.14	9	27
61.8	123.6	12.36	24.36	27.16	9	27
61.9	123.8	12.38	24.38	27.18	9	27
62	124	12.4	24.4	27.2	9	27
62.1	124.2	12.42	24.42	27.22	9	27
62.2	124.4	12.44	24.44	27.24	9	27
62.3	124.6	12.46	24.46	27.26	9	27
62.4	124.8	12.48	24.48	27.28	9	27
62.5	125	12.5	24.5	27.3	9	27
62.6	125.2	12.52	24.52	27.32	9	27
62.7	125.4	12.54	24.54	27.34	9	27
62.8	125.6	12.56	24.56	27.36	10	30
62.9	125.8	12.58	24.58	27.38	10	30
63	126	12.6	24.6	27.4	10	30
63.1	126.2	12.62	24.62	27.42	10	30
63.2	126.4	12.64	24.64	27.44	10	30
63.3	126.6	12.66	24.66	27.46	10	30
63.4	126.8	12.68	24.68	27.48	10	30
63.5	127	12.7	24.7	27.5	10	30
63.6	127.2	12.72	24.72	27.52	10	30
63.7	127.4	12.74	24.74	27.54	10	30
63.8	127.6	12.76	24.76	27.56	10	30
63.9	127.8	12.78	24.78	27.58	10	30
64	128	12.8	24.8	27.6	10	30
64.1	128.2	12.82	24.82	27.62	10	30
64.2	128.4	12.84	24.84	27.64	10	30
64.3	128.6	12.86	24.86	27.66	10	30
64.4	128.8	12.88	24.88	27.68	10	30
64.5	129	12.9	24.9	27.7	10	30
64.6	129.2	12.92	24.92	27.72	10	30
64.7	129.4	12.94	24.94	27.74	10	30
64.8	129.6	12.96	24.96	27.76	10	30
64.9	129.8	12.98	24.98	27.78	10	30
65	130	13	25	27.8	10	30
65.1	130.2	13.02	25.02	27.82	10	30
65.2	130.4	13.04	25.04	27.84	10	30
65.3	130.6	13.06	25.06	27.86	10	30
65.4	130.8	13.08	25.08	27.88	10	30
65.5	131	13.1	25.1	27.9	10	30
65.6	131.2	13.12	25.12	27.92	10	30
65.7	131.4	13.14	25.14	27.94	10	30
65.8	131.6	13.16	25.16	27.96	10	30
65.9	131.8	13.18	25.18	27.98	10	30
66	132	13.2	25.2	28	10	30
66.1	132.2	13.22	25.22	28.02	10	30
66.2	132.4	13.24	25.24	28.04	10	30
66.3	132.6	13.26	25.26	28.06	10	30
66.4	132.8	13.28	25.28	28.08	10	30
66.5	133	13.3	25.3	28.1	10	30
66.6	133.2	13.32	25.32	28.12	10	30
66.7	133.4	13.34	25.34	28.14	10	30
66.8	133.6	13.36	25.36	28.16	10	30
66.9	133.8	13.38	25.38	28.18	10	30
67	134	13.4	25.4	28.2	10	30
67.1	134.2	13.42	25.42	28.22	10	30
67.2	134.4	13.44	25.44	28.24	10	30
67.3	134.6	13.46	25.46	28.26	10	30
67.4	134.8	13.48	25.48	28.28	10	30
67.5	135	13.5	25.5	28.3	12	36
67.6	135.2	13.52	25.52	28.32	12	36
67.7	135.4	13.54	25.54	28.34	12	36
67.8	135.6	13.56	25.56	28.36	12	36
67.9	135.8	13.58	25.58	28.38	12	36
68	136	13.6	25.6	28.4	12	36
68.1	136.2	13.62	25.62	28.42	12	36
68.2	136.4	13.64	25.64	28.44	12	36
68.3	136.6	13.66	25.66	28.46	12	36
68.4	136.8	13.68	25.68	28.48	12	36
68.5	137	13.7	25.7	28.5	12	36
68.6	137.2	13.72	25.72	28.52	12	36
68.7	137.4	13.74	25.74	28.54	12	36
68.8	137.6	13.76	25.76	28.56	12	36
68.9	137.8	13.78	25.78	28.58	12	36
69	138	13.8	25.8	28.6	12	36
69.1	138.2	13.82	25.82	28.62	12	36
69.2	138.4	13.84	25.84	28.64	12	36
69.3	138.6	13.86	25.86	28.66	12	36
69.4	138.8	13.88	25.88	28.68	12	36
69.5	139	13.9	25.9	28.7	12	36
69.6	139.2	13.92	25.92	28.72	12	36
69.7	139.4	13.94	25.94	28.74	12	36
69.8	139.6	13.96	25.96	28.76	12	36
69.9	139.8	13.98	25.98	28.78	12	36
70	140	14	26	28.8	12	36
70.1	140.2	14.02	26.02	28.82	14	42
70.2	140.4	14.04	26.04	28.84	14	42
70.3	140.6	14.06	26.06	28.86	14	42
70.4	140.8	14.08	26.08	28.88	14	42
70.5	141	14.1	26.1	28.9	14	42
70.6	141.2	14.12	26.12	28.92	14	42
70.7	141.4	14.14	26.14	28.94	14	42
70.8	141.6	14.16	26.16	28.96	14	42
70.9	141.8	14.18	26.18	28.98	14	42
71	142	14.2	26.2	29	14	42
71.1	142.2	14.22	26.22	29.02	14	42
71.2	142.4	14.24	26.24	29.04	14	42
71.3	142.6	14.26	26.26	29.06	14	42
71.4	142.8	14.28	26.28	29.08	14	42
71.5	143	14.3	26.3	29.1	14	42
71.6	143.2	14.32	26.32	29.12	14	42
71.7	143.4	14.34	26.34	29.14	14	42
71.8	143.6	14.36	26.36	29.16	14	42
71.9	143.8	14.38	26.38	29.18	14	42
72	144	14.4	26.4	29.2	14	42
72.1	144.2	14.42	26.42	29.22	14	42
72.2	144.4	14.44	26.44	29.24	14	42
72.3	144.6	14.46	26.46	29.26	14	42
72.4	144.8	14.48	26.48	29.28	14	42
72.5	145	14.5	26.5	29.3	14	42
72.6	145.2	14.52	26.52	29.32	14	42
72.7	145.4	14.54	26.54	29.34	14	42
72.8	145.6	14.56	26.56	29.36	14	42
72.9	145.8	14.58	26.58	29.38	14	42
73	146	14.6	26.6	29.4	14	42
73.1	146.2	14.62	26.62	29.42	14	42
73.2	146.4	14.64	26.64	29.44	14	42
73.3	146.6	14.66	26.66	29.46	14	42
73.4	146.8	14.68	26.68	29.48	14	42
73.5	147	14.7	26.7	29.5	14	42
73.6	147.2	14.72	26.72	29.52	14	42
73.7	147.4	14.74	26.74	29.54	14	42
73.8	147.6	14.76	26.76	29.56	14	42
73.9	147.8	14.78	26.78	29.58	14	42
74	148	14.8	26.8	29.6	14	42
74.1	148.2	14.82	26.82	29.62	14	42
74.2	148.4	14.84	26.84	29.64	14	42
74.3	148.6	14.86	26.86	29.66	14	42
74.4	148.8	14.88	26.88	29.68	14	42
74.5	149	14.9	26.9	29.7	14	42
74.6	149.2	14.92	26.92	29.72	14	42
74.7	149.4	14.94	26.94	29.74	14	42
74.8	149.6	14.96	26.96	29.76	14	42
74.9	149.8	14.98	26.98	29.78	14	42
75	150	15	27	29.8	14	42
75.1	150.2	15.02	27.02	29.82	14	42
75.2	150.4	15.04	27.04	29.84	14	42
75.3	150.6	15.06	27.06	29.86	14	42
75.4	150.8	15.08	27.08	29.88	14	42
75.5	151	15.1	27.1	29.9	14	42
75.6	151.2	15.12	27.12	29.92	14	42
75.7	151.4	15.14	27.14	29.94	14	42
75.8	151.6	15.16	27.16	29.96	14	42
75.9	151.8	15.18	27.18	29.98	14	42
76	152	15.2	27.2	30	14	42
76.1	152.2	15.22	27.22	30.02	14	42
76.2	152.4	15.24	27.24	30.04	14	42
76.3	152.6	15.26	27.26	30.06	14	42
76.4	152.8	15.28	27.28	30.08	14	42
76.5	153	15.3	27.3	30.1	14	42
76.6	153.2	15.32	27.32	30.12	14	42
76.7	153.4	15.34	27.34	30.14	14	42
76.8	153.6	15.36	27.36	30.16	14	42
76.9	153.8	15.38	27.38	30.18	14	42
77	154	15.4	27.4	30.2	14	42
77.1	154.2	15.42	27.42	30.22	14	42
77.2	154.4	15.44	27.44	30.24	14	42
77.3	154.6	15.46	27.46	30.26	14	42
77.4	154.8	15.48	27.48	30.28	14	42
77.5	155	15.5	27.5	30.3	14	42
77.6	155.2	15.52	27.52	30.32	14	42
77.7	155.4	15.54	27.54	30.34	16	48
77.8	155.6	15.56	27.56	30.36	16	48
77.9	155.8	15.58	27.58	30.38	16	48
78	156	15.6	27.6	30.4	16	48
78.1	156.2	15.62	27.62	30.42	16	48
78.2	156.4	15.64	27.64	30.44	16	48
78.3	156.6	15.66	27.66	30.46	16	48
78.4	156.8	15.68	27.68	30.48	16	48
78.5	157	15.7	27.7	30.5	16	48
78.6	157.2	15.72	27.72	30.52	16	48
78.7	157.4	15.74	27.74	30.54	16	48
78.8	157.6	15.76	27.76	30.56	16	48
78.9	157.8	15.78	27.78	30.58	16	48
79	158	15.8	27.8	30.6	16	48
79.1	158.2	15.82	27.82	30.62	16	48
79.2	158.4	15.84	27.84	30.64	16	48
79.3	158.6	15.86	27.86	30.66	16	48
79.4	158.8	15.88	27.88	30.68	16	48
79.5	159	15.9	27.9	30.7	16	48
79.6	159.2	15.92	27.92	30.72	16	48
79.7	159.4	15.94	27.94	30.74	16	48
79.8	159.6	15.96	27.96	30.76	16	48
79.9	159.8	15.98	27.98	30.78	16	48
80	160	16	28	30.8	16	48
80.1	160.2	16.02	28.02	30.82	16	48
80.2	160.4	16.04	28.04	30.84	16	48
80.3	160.6	16.06	28.06	30.86	17	51
80.4	160.8	16.08	28.08	30.88	17	51
80.5	161	16.1	28.1	30.9	17	51
80.6	161.2	16.12	28.12	30.92	17	51
80.7	161.4	16.14	28.14	30.94	17	51
80.8	161.6	16.16	28.16	30.96	17	51
80.9	161.8	16.18	28.18	30.98	17	51
81	162	16.2	28.2	31	17	51
81.1	162.2	16.22	28.22	31.02	17	51
81.2	162.4	16.24	28.24	31.04	17	51
81.3	162.6	16.26	28.26	31.06	17	51
81.4	162.8	16.28	28.28	31.08	17	51
81.5	163	16.3	28.3	31.1	17	51
81.6	163.2	16.32	28.32	31.12	17	51
81.7	163.4	16.34	28.34	31.14	17	51
81.8	163.6	16.36	28.36	31.16	17	51
81.9	163.8	16.38	28.38	31.18	17	51
82	164	16.4	28.4	31.2	17	51
82.1	164.2	16.42	28.42	31.22	17	51
82.2	164.4	16.44	28.44	31.24	17	51
82.3	164.6	16.46	28.46	31.26	17	51
82.4	164.8	16.48	28.48	31.28	17	51
82.5	165	16.5	28.5	31.3	17	51
82.6	165.2	16.52	28.52	31.32	17	51
82.7	165.4	16.54	28.54	31.34	17	51
82.8	165.6	16.56	28.56	31.36	17	51
82.9	165.8	16.58	28.58	31.38	17	51
83	166	16.6	28.6	31.4	17	51
83.1	166.2	16.62	28.62	31.42	17	51
83.2	166.4	16.64	28.64	31.44	17	51
83.3	166.6	16.66	28.66	31.46	17	51
83.4	166.8	16.68	28.68	31.48	17	51
83.5	167	16.7	28.7	31.5	17	51
83.6	167.2	16.72	28.72	31.52	17	51
83.7	167.4	16.74	28.74	31.54	17	51
83.8	167.6	16.76	28.76	31.56	17	51
83.9	167.8	16.78	28.78	31.58	17	51
84	168	16.8	28.8	31.6	17	51
84.1	168.2	16.82	28.82	31.62	17	51
84.2	168.4	16.84	28.84	31.64	17	51
84.3	168.6	16.86	28.86	31.66	17	51
84.4	168.8	16.88	28.88	31.68	17	51
84.5	169	16.9	28.9	31.7	17	51
84.6	169.2	16.92	28.92	31.72	18	54
84.7	169.4	16.94	28.94	31.74	18	54
84.8	169.6	16.96	28.96	31.76	18	54
84.9	169.8	16.98	28.98	31.78	18	54
85	170	17	29	31.8	18	54
85.1	170.2	17.02	29.02	31.82	18	54
85.2	170.4	17.04	29.04	31.84	18	54
85.3	170.6	17.06	29.06	31.86	18	54
85.4	170.8	17.08	29.08	31.88	18	54
85.5	171	17.1	29.1	31.9	18	54
85.6	171.2	17.12	29.12	31.92	18	54
85.7	171.4	17.14	29.14	31.94	18	54
85.8	171.6	17.16	29.16	31.96	18	54
85.9	171.8	17.18	29.18	31.98	18	54
86	172	17.2	29.2	32	18	54
86.1	172.2	17.22	29.22	32.02	18	54
86.2	172.4	17.24	29.24	32.04	18	54
86.3	172.6	17.26	29.26	32.06	18	54
86.4	172.8	17.28	29.28	32.08	18	54
86.5	173	17.3	29.3	32.1	18	54
86.6	173.2	17.32	29.32	32.12	18	54
86.7	173.4	17.34	29.34	32.14	18	54
86.8	173.6	17.36	29.36	32.16	18	54
86.9	173.8	17.38	29.38	32.18	18	54
87	174	17.4	29.4	32.2	18	54
87.1	174.2	17.42	29.42	32.22	18	54
87.2	174.4	17.44	29.44	32.24	18	54
87.3	174.6	17.46	29.46	32.26	18	54
87.4	174.8	17.48	29.48	32.28	18	54
87.5	175	17.5	29.5	32.3	18	54
87.6	175.2	17.52	29.52	32.32	18	54
87.7	175.4	17.54	29.54	32.34	18	54
87.8	175.6	17.56	29.56	32.36	18	54
87.9	175.8	17.58	29.58	32.38	18	54
88	176	17.6	29.6	32.4	18	54
88.1	176.2	17.62	29.62	32.42	18	54
88.2	176.4	17.64	29.64	32.44	18	54
88.3	176.6	17.66	29.66	32.46	18	54
88.4	176.8	17.68	29.68	32.48	18	54
88.5	177	17.7	29.7	32.5	18	54
88.6	177.2	17.72	29.72	32.52	18	54
88.7	177.4	17.74	29.74	32.54	18	54
88.8	177.6	17.76	29.76	32.56	18	54
88.9	177.8	17.78	29.78	32.58	18	54
89	178	17.8	29.8	32.6	18	54
89.1	178.2	17.82	29.82	32.62	18	54
89.2	178.4	17.84	29.84	32.64	18	54
89.3	178.6	17.86	29.86	32.66	18	54
89.4	178.8	17.88	29.88	32.68	18	54
89.5	179	17.9	29.9	32.7	18	54
89.6	179.2	17.92	29.92	32.72	18	54
89.7	179.4	17.94	29.94	32.74	18	54
89.8	179.6	17.96	29.96	32.76	18	54
89.9	179.8	17.98	29.98	32.78	18	54
90	180	18	30	32.8	18	54
90.1	180.2	18.02	30.02	32.82	18	54
90.2	180.4	18.04	30.04	32.84	18	54
90.3	180.6	18.06	30.06	32.86	18	54
90.4	180.8	18.08	30.08	32.88	18	54
90.5	181	18.1	30.1	32.9	18	54
90.6	181.2	18.12	30.12	32.92	18	54
90.7	181.4	18.14	30.14	32.94	18	54
90.8	181.6	18.16	30.16	32.96	18	54
90.9	181.8	18.18	30.18	32.98	18	54
91	182	18.2	30.2	33	18	54
91.1	182.2	18.22	30.22	33.02	18	54
91.2	182.4	18.24	30.24	33.04	18	54
91.3	182.6	18.26	30.26	33.06	18	54
91.4	182.8	18.28	30.28	33.08	18	54
91.5	183	18.3	30.3	33.1	18	54
91.6	183.2	18.32	30.32	33.12	18	54
91.7	183.4	18.34	30.34	33.14	18	54
91.8	183.6	18.36	30.36	33.16	18	54
91.9	183.8	18.38	30.38	33.18	18	54
92	184	18.4	30.4	33.2	18	54
92.1	184.2	18.42	30.42	33.22	18	54
92.2	184.4	18.44	30.44	33.24	18	54
92.3	184.6	18.46	30.46	33.26	18	54
92.4	184.8	18.48	30.48	33.28	18	54
92.5	185	18.5	30.5	33.3	18	54
92.6	185.2	18.52	30.52	33.32	18	54
92.7	185.4	18.54	30.54	33.34	18	54
92.8	185.6	18.56	30.56	33.36	18	54
92.9	185.8	18.58	30.58	33.38	18	54
93	186	18.6	30.6	33.4	18	54
93.1	186.2	18.62	30.62	33.42	18	54
93.2	186.4	18.64	30.64	33.44	18	54
93.3	186.6	18.66	30.66	33.46	18	54
93.4	186.8	18.68	30.68	33.48	18	54
93.5	187	18.7	30.7	33.5	18	54
93.6	187.2	18.72	30.72	33.52	18	54
93.7	187.4	18.74	30.74	33.54	18	54
93.8	187.6	18.76	30.76	33.56	18	54
93.9	187.8	18.78	30.78	33.58	18	54
94	188	18.8	30.8	33.6	18	54
94.1	188.2	18.82	30.82	33.62	18	54
94.2	188.4	18.84	30.84	33.64	18	54
94.3	188.6	18.86	30.86	33.66	18	54
94.4	188.8	18.88	30.88	33.68	18	54
94.5	189	18.9	30.9	33.7	18	54
94.6	189.2	18.92	30.92	33.72	18	54
94.7	189.4	18.94	30.94	33.74	18	54
94.8	189.6	18.96	30.96	33.76	18	54
94.9	189.8	18.98	30.98	33.78	18	54
95	190	19	31	33.8	18	54
95.1	190.2	19.02	31.02	33.82	18	54
95.2	190.4	19.04	31.04	33.84	18	54
95.3	190.6	19.06	31.06	33.86	18	54
95.4	190.8	19.08	31.08	33.88	18	54
95.5	191	19.1	31.1	33.9	18	54
95.6	191.2	19.12	31.12	33.92	18	54
95.7	191.4	19.14	31.14	33.94	18	54
95.8	191.6	19.16	31.16	33.96	18	54
95.9	191.8	19.18	31.18	33.98	18	54
96	192	19.2	31.2	34	18	54
96.1	192.2	19.22	31.22	34.02	18	54
96.2	192.4	19.24	31.24	34.04	18	54
96.3	192.6	19.26	31.26	34.06	18	54
96.4	192.8	19.28	31.28	34.08	18	54
96.5	193	19.3	31.3	34.1	18	54
96.6	193.2	19.32	31.32	34.12	18	54
96.7	193.4	19.34	31.34	34.14	18	54
96.8	193.6	19.36	31.36	34.16	18	54
96.9	193.8	19.38	31.38	34.18	18	54
97	194	19.4	31.4	34.2	18	54
97.1	194.2	19.42	31.42	34.22	18	54
97.2	194.4	19.44	31.44	34.24	18	54
97.3	194.6	19.46	31.46	34.26	18	54
97.4	194.8	19.48	31.48	34.28	20	60
97.5	195	19.5	31.5	34.3	20	60
97.6	195.2	19.52	31.52	34.32	20	60
97.7	195.4	19.54	31.54	34.34	20	60
97.8	195.6	19.56	31.56	34.36	20	60
97.9	195.8	19.58	31.58	34.38	20	60
98	196	19.6	31.6	34.4	20	60
98.1	196.2	19.62	31.62	34.42	21	63
98.2	196.4	19.64	31.64	34.44	21	63
98.3	196.6	19.66	31.66	34.46	21	63
98.4	196.8	19.68	31.68	34.48	21	63
98.5	197	19.7	31.7	34.5	21	63
98.6	197.2	19.72	31.72	34.52	21	63
98.7	197.4	19.74	31.74	34.54	21	63
98.8	197.6	19.76	31.76	34.56	21	63
98.9	197.8	19.78	31.78	34.58	21	63
99	198	19.8	31.8	34.6	21	63
99.1	198.2	19.82	31.82	34.62	21	63
99.2	198.4	19.84	31.84	34.64	21	63
99.3	198.6	19.86	31.86	34.66	21	63
99.4	198.8	19.88	31.88	34.68	21	63
99.5	199	19.9	31.9	34.7	22	66
99.6	199.2	19.92	31.92	34.72	22	66
99.7	199.4	19.94	31.94	34.74	22	66
99.8	199.6	19.96	31.96	34.76	22	66
99.9	199.8	19.98	31.98	34.78	22	66
100	200	20	32	34.8	22	66
100.1	200.2	20.02	32.02	34.82	22	66
100.2	200.4	20.04	32.04	34.84	22	66
100.3	200.6	20.06	32.06	34.86	22	66
100.4	200.8	20.08	32.08	34.88	22	66
100.5	201	20.1	32.1	34.9	22	66
100.6	201.2	20.12	32.12	34.92	22	66
100.7	201.4	20.14	32.14	34.94	22	66
100.8	201.6	20.16	32.16	34.96	22	66
100.9	201.8	20.18	32.18	34.98	22	66
101	202	20.2	32.2	35	22	66
101.1	202.2	20.22	32.22	35.02	22	66
101.2	202.4	20.24	32.24	35.04	22	66
101.3	202.6	20.26	32.26	35.06	22	66
101.4	202.8	20.28	32.28	35.08	22	66
101.5	203	20.3	32.3	35.1	22	66
101.6	203.2	20.32	32.32	35.12	22	66
101.7	203.4	20.34	32.34	35.14	22	66
101.8	203.6	20.36	32.36	35.16	22	66
101.9	203.8	20.38	32.38	35.18	23	69
102	204	20.4	32.4	35.2	23	69
102.1	204.2	20.42	32.42	35.22	23	69
102.2	204.4	20.44	32.44	35.24	23	69
102.3	204.6	20.46	32.46	35.26	23	69
102.4	204.8	20.48	32.48	35.28	23	69
102.5	205	20.5	32.5	35.3	23	69
102.6	205.2	20.52	32.52	35.32	23	69
102.7	205.4	20.54	32.54	35.34	23	69
102.8	205.6	20.56	32.56	35.36	23	69
102.9	205.8	20.58	32.58	35.38	23	69
103	206	20.6	32.6	35.4	23	69
103.1	206.2	20.62	32.62	35.42	23	69
103.2	206.4	20.64	32.64	35.44	23	69
103.3	206.6	20.66	32.66	35.46	23	69
103.4	206.8	20.68	32.68	35.48	23	69
103.5	207	20.7	32.7	35.5	24	72
103.6	207.2	20.72	32.72	35.52	24	72
103.7	207.4	20.74	32.74	35.54	24	72
103.8	207.6	20.76	32.76	35.56	24	72
103.9	207.8	20.78	32.78	35.58	24	72
104	208	20.8	32.8	35.6	24	72
104.1	208.2	20.82	32.82	35.62	24	72
104.2	208.4	20.84	32.84	35.64	24	72
104.3	208.6	20.86	32.86	35.66	24	72
104.4	208.8	20.88	32.88	35.68	24	72
104.5	209	20.9	32.9	35.7	24	72
104.6	209.2	20.92	32.92	35.72	24	72
104.7	209.4	20.94	32.94	35.74	25	75
104.8	209.6	20.96	32.96	35.76	25	75
104.9	209.8	20.98	32.98	35.78	25	75
105	210	21	33	35.8	25	75
105.1	210.2	21.02	33.02	35.82	25	75
105.2	210.4	21.04	33.04	35.84	25	75
105.3	210.6	21.06	33.06	35.86	25	75
105.4	210.8	21.08	33.08	35.88	28	84
105.5	211	21.1	33.1	35.9	28	84
105.6	211.2	21.12	33.12	35.92	28	84
105.7	211.4	21.14	33.14	35.94	28	84
105.8	211.6	21.16	33.16	35.96	28	84
105.9	211.8	21.18	33.18	35.98	28	84
106	212	21.2	33.2	36	28	84
106.1	212.2	21.22	33.22	36.02	28	84
106.2	212.4	21.24	33.24	36.04	28	84
106.3	212.6	21.26	33.26	36.06	28	84
106.4	212.8	21.28	33.28	36.08	28	84
106.5	213	21.3	33.3	36.1	28	84
106.6	213.2	21.32	33.32	36.12	28	84
106.7	213.4	21.34	33.34	36.14	28	84
106.8	213.6	21.36	33.36	36.16	28	84
106.9	213.8	21.38	33.38	36.18	28	84
107	214	21.4	33.4	36.2	28	84
107.1	214.2	21.42	33.42	36.22	28	84
107.2	214.4	21.44	33.44	36.24	28	84
107.3	214.6	21.46	33.46	36.26	28	84
107.4	214.8	21.48	33.48	36.28	28	84
107.5	215	21.5	33.5	36.3	28	84
107.6	215.2	21.52	33.52	36.32	28	84
107.7	215.4	21.54	33.54	36.34	28	84
107.8	215.6	21.56	33.56	36.36	28	84
107.9	215.8	21.58	33.58	36.38	28	84
108	216	21.6	33.6	36.4	28	84
108.1	216.2	21.62	33.62	36.42	28	84
108.2	216.4	21.64	33.64	36.44	28	84
108.3	216.6	21.66	33.66	36.46	28	84
108.4	216.8	21.68	33.68	36.48	28	84
108.5	217	21.7	33.7	36.5	28	84
108.6	217.2	21.72	33.72	36.52	28	84
108.7	217.4	21.74	33.74	36.54	28	84
108.8	217.6	21.76	33.76	36.56	32	96
108.9	217.8	21.78	33.78	36.58	32	96
109	218	21.8	33.8	36.6	32	96
109.1	218.2	21.82	33.82	36.62	32	96
109.2	218.4	21.84	33.84	36.64	32	96
109.3	218.6	21.86	33.86	36.66	32	96
109.4	218.8	21.88	33.88	36.68	32	96
109.5	219	21.9	33.9	36.7	32	96
109.6	219.2	21.92	33.92	36.72	32	96
109.7	219.4	21.94	33.94	36.74	32	96
109.8	219.6	21.96	33.96	36.76	32	96
109.9	219.8	21.98	33.98	36.78	32	96
110	220	22	34	36.8	32	96
110.1	220.2	22.02	34.02	36.82	32	96
110.2	220.4	22.04	34.04	36.84	32	96
110.3	220.6	22.06	34.06	36.86	32	96
110.4	220.8	22.08	34.08	36.88	32	96
110.5	221	22.1	34.1	36.9	32	96
110.6	221.2	22.12	34.12	36.92	32	96
110.7	221.4	22.14	34.14	36.94	32	96
110.8	221.6	22.16	34.16	36.96	32	96
110.9	221.8	22.18	34.18	36.98	32	96
111	222	22.2	34.2	37	32	96
111.1	222.2	22.22	34.22	37.02	32	96
111.2	222.4	22.24	34.24	37.04	32	96
111.3	222.6	22.26	34.26	37.06	32	96
111.4	222.8	22.28	34.28	37.08	32	96
111.5	223	22.3	34.3	37.1	32	96
111.6	223.2	22.32	34.32	37.12	32	96
111.7	223.4	22.34	34.34	37.14	32	96
111.8	223.6	22.36	34.36	37.16	32	96
111.9	223.8	22.38	34.38	37.18	32	96
112	224	22.4	34.4	37.2	32	96
112.1	224.2	22.42	34.42	37.22	32	96
112.2	224.4	22.44	34.44	37.24	32	96
112.3	224.6	22.46	34.46	37.26	32	96
112.4	224.8	22.48	34.48	37.28	32	96
112.5	225	22.5	34.5	37.3	32	96
112.6	225.2	22.52	34.52	37.32	32	96
112.7	225.4	22.54	34.54	37.34	32	96
112.8	225.6	22.56	34.56	37.36	32	96
112.9	225.8	22.58	34.58	37.38	33	99
113	226	22.6	34.6	37.4	33	99
113.1	226.2	22.62	34.62	37.42	33	99
113.2	226.4	22.64	34.64	37.44	33	99
113.3	226.6	22.66	34.66	37.46	33	99
113.4	226.8	22.68	34.68	37.48	33	99
113.5	227	22.7	34.7	37.5	33	99
113.6	227.2	22.72	34.72	37.52	33	99
113.7	227.4	22.74	34.74	37.54	33	99
113.8	227.6	22.76	34.76	37.56	33	99
113.9	227.8	22.78	34.78	37.58	33	99
114	228	22.8	34.8	37.6	33	99
114.1	228.2	22.82	34.82	37.62	33	99
114.2	228.4	22.84	34.84	37.64	33	99
114.3	228.6	22.86	34.86	37.66	33	99
114.4	228.8	22.88	34.88	37.68	33	99
114.5	229	22.9	34.9	37.7	33	99
114.6	229.2	22.92	34.92	37.72	33	99
114.7	229.4	22.94	34.94	37.74	33	99
114.8	229.6	22.96	34.96	37.76	33	99
114.9	229.8	22.98	34.98	37.78	33	99
115	230	23	35	37.8	33	99
115.1	230.2	23.02	35.02	37.82	33	99
115.2	230.4	23.04	35.04	37.84	33	99
115.3	230.6	23.06	35.06	37.86	33	99
115.4	230.8	23.08	35.08	37.88	33	99
115.5	231	23.1	35.1	37.9	33	99
115.6	231.2	23.12	35.12	37.92	33	99
115.7	231.4	23.14	35.14	37.94	33	99
115.8	231.6	23.16	35.16	37.96	33	99
115.9	231.8	23.18	35.18	37.98	33	99
116	232	23.2	35.2	38	33	99
116.1	232.2	23.22	35.22	38.02	33	99
116.2	232.4	23.24	35.24	38.04	33	99
116.3	232.6	23.26	35.26	38.06	33	99
116.4	232.8	23.28	35.28	38.08	33	99
116.5	233	23.3	35.3	38.1	33	99
116.6	233.2	23.32	35.32	38.12	33	99
116.7	233.4	23.34	35.34	38.14	33	99
116.8	233.6	23.36	35.36	38.16	33	99
116.9	233.8	23.38	35.38	38.18	33	99
117	234	23.4	35.4	38.2	33	99
117.1	234.2	23.42	35.42	38.22	33	99
117.2	234.4	23.44	35.44	38.24	33	99
117.3	234.6	23.46	35.46	38.26	33	99
117.4	234.8	23.48	35.48	38.28	33	99
117.5	235	23.5	35.5	38.3	33	99
117.6	235.2	23.52	35.52	38.32	33	99
117.7	235.4	23.54	35.54	38.34	33	99
117.8	235.6	23.56	35.56	38.36	33	99
117.9	235.8	23.58	35.58	38.38	33	99
118	236	23.6	35.6	38.4	33	99
118.1	236.2	23.62	35.62	38.42	33	99
118.2	236.4	23.64	35.64	38.44	33	99
118.3	236.6	23.66	35.66	38.46	33	99
118.4	236.8	23.68	35.68	38.48	33	99
118.5	237	23.7	35.7	38.5	33	99
118.6	237.2	23.72	35.72	38.52	33	99
118.7	237.4	23.74	35.74	38.54	33	99
118.8	237.6	23.76	35.76	38.56	33	99
118.9	237.8	23.78	35.78	38.58	33	99
119	238	23.8	35.8	38.6	34	102
119.1	238.2	23.82	35.82	38.62	36	108
119.2	238.4	23.84	35.84	38.64	36	108
119.3	238.6	23.86	35.86	38.66	36	108
119.4	238.8	23.88	35.88	38.68	36	108
119.5	239	23.9	35.9	38.7	36	108
119.6	239.2	23.92	35.92	38.72	36	108
119.7	239.4	23.94	35.94	38.74	36	108
119.8	239.6	23.96	35.96	38.76	36	108
119.9	239.8	23.98	35.98	38.78	36	108
120	240	24	36	38.8	36	108
120.1	240.2	24.02	36.02	38.82	36	108
120.2	240.4	24.04	36.04	38.84	36	108
120.3	240.6	24.06	36.06	38.86	36	108
120.4	240.8	24.08	36.08	38.88	36	108
120.5	241	24.1	36.1	38.9	36	108
120.6	241.2	24.12	36.12	38.92	36	108
120.7	241.4	24.14	36.14	38.94	36	108
120.8	241.6	24.16	36.16	38.96	36	108
120.9	241.8	24.18	36.18	38.98	36	108
121	242	24.2	36.2	39	36	108
121.1	242.2	24.22	36.22	39.02	36	108
121.2	242.4	24.24	36.24	39.04	36	108
121.3	242.6	24.26	36.26	39.06	36	108
121.4	242.8	24.28	36.28	39.08	36	108
121.5	243	24.3	36.3	39.1	36	108
121.6	243.2	24.32	36.32	39.12	36	108
121.7	243.4	24.34	36.34	39.14	36	108
121.8	243.6	24.36	36.36	39.16	36	108
121.9	243.8	24.38	36.38	39.18	36	108
122	244	24.4	36.4	39.2	36	108
122.1	244.2	24.42	36.42	39.22	36	108
122.2	244.4	24.44	36.44	39.24	36	108
122.3	244.6	24.46	36.46	39.26	36	108
122.4	244.8	24.48	36.48	39.28	36	108
122.5	245	24.5	36.5	39.3	36	108
122.6	245.2	24.52	36.52	39.32	36	108
122.7	245.4	24.54	36.54	39.34	36	108
122.8	245.6	24.56	36.56	39.36	36	108
122.9	245.8	24.58	36.58	39.38	36	108
123	246	24.6	36.6	39.4	36	108
123.1	246.2	24.62	36.62	39.42	36	108
123.2	246.4	24.64	36.64	39.44	36	108
123.3	246.6	24.66	36.66	39.46	36	108
123.4	246.8	24.68	36.68	39.48	36	108
123.5	247	24.7	36.7	39.5	36	108
123.6	247.2	24.72	36.72	39.52	36	108
123.7	247.4	24.74	36.74	39.54	36	108
123.8	247.6	24.76	36.76	39.56	36	108
123.9	247.8	24.78	36.78	39.58	36	108
124	248	24.8	36.8	39.6	36	108
124.1	248.2	24.82	36.82	39.62	36	108
124.2	248.4	24.84	36.84	39.64	36	108
124.3	248.6	24.86	36.86	39.66	36	108
124.4	248.8	24.88	36.88	39.68	36	108
124.5	249	24.9	36.9	39.7	36	108
124.6	249.2	24.92	36.92	39.72	36	108
124.7	249.4	24.94	36.94	39.74	36	108
124.8	249.6	24.96	36.96	39.76	36	108
124.9	249.8	24.98	36.98	39.78	36	108
125	250	25	37	39.8	36	108
125.1	250.2	25.02	37.02	39.82	36	108
125.2	250.4	25.04	37.04	39.84	36	108
125.3	250.6	25.06	37.06	39.86	36	108
125.4	250.8	25.08	37.08	39.88	36	108
125.5	251	25.1	37.1	39.9	36	108
125.6	251.2	25.12	37.12	39.92	36	108
125.7	251.4	25.14	37.14	39.94	36	108
125.8	251.6	25.16	37.16	39.96	36	108
125.9	251.8	25.18	37.18	39.98	36	108
126	252	25.2	37.2	40	36	108
126.1	252.2	25.22	37.22	40.02	36	108
126.2	252.4	25.24	37.24	40.04	36	108
126.3	252.6	25.26	37.26	40.06	36	108
126.4	252.8	25.28	37.28	40.08	36	108
126.5	253	25.3	37.3	40.1	36	108
126.6	253.2	25.32	37.32	40.12	38	114
126.7	253.4	25.34	37.34	40.14	38	114
126.8	253.6	25.36	37.36	40.16	38	114
126.9	253.8	25.38	37.38	40.18	38	114
127	254	25.4	37.4	40.2	38	114
127.1	254.2	25.42	37.42	40.22	39	117
127.2	254.4	25.44	37.44	40.24	40	120
127.3	254.6	25.46	37.46	40.26	40	120
127.4	254.8	25.48	37.48	40.28	40	120
127.5	255	25.5	37.5	40.3	40	120
127.6	255.2	25.52	37.52	40.32	40	120
127.7	255.4	25.54	37.54	40.34	40	120
127.8	255.6	25.56	37.56	40.36	40	120
127.9	255.8	25.58	37.58	40.38	40	120
128	256	25.6	37.6	40.4	40	120
128.1	256.2	25.62	37.62	40.42	40	120
128.2	256.4	25.64	37.64	40.44	40	120
128.3	256.6	25.66	37.66	40.46	40	120
128.4	256.8	25.68	37.68	40.48	40	120
128.5	257	25.7	37.7	40.5	40	120
128.6	257.2	25.72	37.72	40.52	40	120
128.7	257.4	25.74	37.74	40.54	40	120
128.8	257.6	25.76	37.76	40.56	40	120
128.9	257.8	25.78	37.78	40.58	40	120
129	258	25.8	37.8	40.6	40	120
129.1	258.2	25.82	37.82	40.62	40	120
129.2	258.4	25.84	37.84	40.64	40	120
129.3	258.6	25.86	37.86	40.66	40	120
129.4	258.8	25.88	37.88	40.68	40	120
129.5	259	25.9	37.9	40.7	40	120
129.6	259.2	25.92	37.92	40.72	40	120
129.7	259.4	25.94	37.94	40.74	40	120
129.8	259.6	25.96	37.96	40.76	40	120
129.9	259.8	25.98	37.98	40.78	40	120
130	260	26	38	40.8	40	120
130.1	260.2	26.02	38.02	40.82	40	120
130.2	260.4	26.04	38.04	40.84	40	120
130.3	260.6	26.06	38.06	40.86	40	120
130.4	260.8	26.08	38.08	40.88	40	120
130.5	261	26.1	38.1	40.9	40	120
130.6	261.2	26.12	38.12	40.92	40	120
130.7	261.4	26.14	38.14	40.94	40	120
130.8	261.6	26.16	38.16	40.96	40	120
130.9	261.8	26.18	38.18	40.98	40	120
131	262	26.2	38.2	41	40	120
131.1	262.2	26.22	38.22	41.02	40	120
131.2	262.4	26.24	38.24	41.04	40	120
131.3	262.6	26.26	38.26	41.06	40	120
131.4	262.8	26.28	38.28	41.08	40	120
131.5	263	26.3	38.3	41.1	40	120
131.6	263.2	26.32	38.32	41.12	40	120
131.7	263.4	26.34	38.34	41.14	40	120
131.8	263.6	26.36	38.36	41.16	40	120
131.9	263.8	26.38	38.38	41.18	40	120
132	264	26.4	38.4	41.2	40	120
132.1	264.2	26.42	38.42	41.22	40	120
132.2	264.4	26.44	38.44	41.24	40	120
132.3	264.6	26.46	38.46	41.26	40	120
132.4	264.8	26.48	38.48	41.28	40	120
132.5	265	26.5	38.5	41.3	40	120
132.6	265.2	26.52	38.52	41.32	40	120
132.7	265.4	26.54	38.54	41.34	40	120
132.8	265.6	26.56	38.56	41.36	40	120
132.9	265.8	26.58	38.58	41.38	40	120
133	266	26.6	38.6	41.4	40	120
133.1	266.2	26.62	38.62	41.42	40	120
133.2	266.4	26.64	38.64	41.44	40	120
133.3	266.6	26.66	38.66	41.46	40	120
133.4	266.8	26.68	38.68	41.48	40	120
133.5	267	26.7	38.7	41.5	40	120
133.6	267.2	26.72	38.72	41.52	40	120
133.7	267.4	26.74	38.74	41.54	40	120
133.8	267.6	26.76	38.76	41.56	40	120
133.9	267.8	26.78	38.78	41.58	40	120
134	268	26.8	38.8	41.6	40	120
134.1	268.2	26.82	38.82	41.62	40	120
134.2	268.4	26.84	38.84	41.64	40	120
134.3	268.6	26.86	38.86	41.66	40	120
134.4	268.8	26.88	38.88	41.68	40	120
134.5	269	26.9	38.9	41.7	40	120
134.6	269.2	26.92	38.92	41.72	40	120
134.7	269.4	26.94	38.94	41.74	40	120
134.8	269.6	26.96	38.96	41.76	40	120
134.9	269.8	26.98	38.98	41.78	40	120
135	270	27	39	41.8	40	120
135.1	270.2	27.02	39.02	41.82	40	120
135.2	270.4	27.04	39.04	41.84	40	120
135.3	270.6	27.06	39.06	41.86	40	120
135.4	270.8	27.08	39.08	41.88	40	120
135.5	271	27.1	39.1	41.9	40	120
135.6	271.2	27.12	39.12	41.92	40	120
135.7	271.4	27.14	39.14	41.94	40	120
135.8	271.6	27.16	39.16	41.96	40	120
135.9	271.8	27.18	39.18	41.98	40	120
136	272	27.2	39.2	42	40	120
136.1	272.2	27.22	39.22	42.02	40	120
136.2	272.4	27.24	39.24	42.04	40	120
136.3	272.6	27.26	39.26	42.06	40	120
136.4	272.8	27.28	39.28	42.08	40	120
136.5	273	27.3	39.3	42.1	40	120
136.6	273.2	27.32	39.32	42.12	40	120
136.7	273.4	27.34	39.34	42.14	40	120
136.8	273.6	27.36	39.36	42.16	40	120
136.9	273.8	27.38	39.38	42.18	40	120
137	274	27.4	39.4	42.2	40	120
137.1	274.2	27.42	39.42	42.22	44	132
137.2	274.4	27.44	39.44	42.24	44	132
137.3	274.6	27.46	39.46	42.26	44	132
137.4	274.8	27.48	39.48	42.28	44	132
137.5	275	27.5	39.5	42.3	44	132
137.6	275.2	27.52	39.52	42.32	44	132
137.7	275.4	27.54	39.54	42.34	44	132
137.8	275.6	27.56	39.56	42.36	44	132
137.9	275.8	27.58	39.58	42.38	44	132
138	276	27.6	39.6	42.4	44	132
138.1	276.2	27.62	39.62	42.42	44	132
138.2	276.4	27.64	39.64	42.44	44	132
138.3	276.6	27.66	39.66	42.46	44	132
138.4	276.8	27.68	39.68	42.48	44	132
138.5	277	27.7	39.7	42.5	44	132
138.6	277.2	27.72	39.72	42.52	44	132
138.7	277.4	27.74	39.74	42.54	44	132
138.8	277.6	27.76	39.76	42.56	44	132
138.9	277.8	27.78	39.78	42.58	44	132
139	278	27.8	39.8	42.6	44	132
139.1	278.2	27.82	39.82	42.62	44	132
139.2	278.4	27.84	39.84	42.64	44	132
139.3	278.6	27.86	39.86	42.66	44	132
139.4	278.8	27.88	39.88	42.68	44	132
139.5	279	27.9	39.9	42.7	44	132
139.6	279.2	27.92	39.92	42.72	44	132
139.7	279.4	27.94	39.94	42.74	44	132
139.8	279.6	27.96	39.96	42.76	44	132
139.9	279.8	27.98	39.98	42.78	44	132
140	280	28	40	42.8	44	132
140.1	280.2	28.02	40.02	42.82	44	132
140.2	280.4	28.04	40.04	42.84	44	132
140.3	280.6	28.06	40.06	42.86	44	132
140.4	280.8	28.08	40.08	42.88	44	132
140.5	281	28.1	40.1	42.9	44	132
140.6	281.2	28.12	40.12	42.92	44	132
140.7	281.4	28.14	40.14	42.94	44	132
140.8	281.6	28.16	40.16	42.96	44	132
140.9	281.8	28.18	40.18	42.98	44	132
141	282	28.2	40.2	43	44	132
141.1	282.2	28.22	40.22	43.02	44	132
141.2	282.4	28.24	40.24	43.04	44	132
141.3	282.6	28.26	40.26	43.06	45	135
141.4	282.8	28.28	40.28	43.08	45	135
141.5	283	28.3	40.3	43.1	45	135
141.6	283.2	28.32	40.32	43.12	45	135
141.7	283.4	28.34	40.34	43.14	45	135
141.8	283.6	28.36	40.36	43.16	45	135
141.9	283.8	28.38	40.38	43.18	45	135
142	284	28.4	40.4	43.2	45	135
142.1	284.2	28.42	40.42	43.22	45	135
142.2	284.4	28.44	40.44	43.24	45	135
142.3	284.6	28.46	40.46	43.26	45	135
142.4	284.8	28.48	40.48	43.28	45	135
142.5	285	28.5	40.5	43.3	45	135
142.6	285.2	28.52	40.52	43.32	45	135
142.7	285.4	28.54	40.54	43.34	45	135
142.8	285.6	28.56	40.56	43.36	45	135
142.9	285.8	28.58	40.58	43.38	45	135
143	286	28.6	40.6	43.4	45	135
143.1	286.2	28.62	40.62	43.42	45	135
143.2	286.4	28.64	40.64	43.44	45	135
143.3	286.6	28.66	40.66	43.46	45	135
143.4	286.8	28.68	40.68	43.48	45	135
143.5	287	28.7	40.7	43.5	45	135
143.6	287.2	28.72	40.72	43.52	45	135
143.7	287.4	28.74	40.74	43.54	51	153
143.8	287.6	28.76	40.76	43.56	51	153
143.9	287.8	28.78	40.78	43.58	51	153
144	288	28.8	40.8	43.6	51	153
144.1	288.2	28.82	40.82	43.62	51	153
144.2	288.4	28.84	40.84	43.64	51	153
144.3	288.6	28.86	40.86	43.66	51	153
144.4	288.8	28.88	40.88	43.68	51	153
144.5	289	28.9	40.9	43.7	51	153
144.6	289.2	28.92	40.92	43.72	51	153
144.7	289.4	28.94	40.94	43.74	51	153
144.8	289.6	28.96	40.96	43.76	51	153
144.9	289.8	28.98	40.98	43.78	51	153
145	290	29	41	43.8	51	153
145.1	290.2	29.02	41.02	43.82	51	153
145.2	290.4	29.04	41.04	43.84	51	153
145.3	290.6	29.06	41.06	43.86	51	153
145.4	290.8	29.08	41.08	43.88	51	153
145.5	291	29.1	41.1	43.9	51	153
145.6	291.2	29.12	41.12	43.92	51	153
145.7	291.4	29.14	41.14	43.94	51	153
145.8	291.6	29.16	41.16	43.96	51	153
145.9	291.8	29.18	41.18	43.98	51	153
146	292	29.2	41.2	44	58	174
146.1	292.2	29.22	41.22	44.02	58	174
146.2	292.4	29.24	41.24	44.04	58	174
146.3	292.6	29.26	41.26	44.06	58	174
146.4	292.8	29.28	41.28	44.08	58	174
146.5	293	29.3	41.3	44.1	58	174
146.6	293.2	29.32	41.32	44.12	58	174
146.7	293.4	29.34	41.34	44.14	58	174
146.8	293.6	29.36	41.36	44.16	58	174
146.9	293.8	29.38	41.38	44.18	58	174
147	294	29.4	41.4	44.2	58	174
147.1	294.2	29.42	41.42	44.22	58	174
147.2	294.4	29.44	41.44	44.24	58	174
147.3	294.6	29.46	41.46	44.26	58	174
147.4	294.8	29.48	41.48	44.28	58	174
147.5	295	29.5	41.5	44.3	58	174
147.6	295.2	29.52	41.52	44.32	58	174
147.7	295.4	29.54	41.54	44.34	58	174
147.8	295.6	29.56	41.56	44.36	58	174
147.9	295.8	29.58	41.58	44.38	58	174
148	296	29.6	41.6	44.4	58	174
148.1	296.2	29.62	41.62	44.42	58	174
148.2	296.4	29.64	41.64	44.44	58	174
148.3	296.6	29.66	41.66	44.46	58	174
148.4	296.8	29.68	41.68	44.48	58	174
148.5	297	29.7	41.7	44.5	58	174
148.6	297.2	29.72	41.72	44.52	58	174
148.7	297.4	29.74	41.74	44.54	58	174
148.8	297.6	29.76	41.76	44.56	58	174
148.9	297.8	29.78	41.78	44.58	58	174
149	298	29.8	41.8	44.6	59	177
149.1	298.2	29.82	41.82	44.62	59	177
149.2	298.4	29.84	41.84	44.64	59	177
149.3	298.6	29.86	41.86	44.66	59	177
149.4	298.8	29.88	41.88	44.68	59	177
149.5	299	29.9	41.9	44.7	59	177
149.6	299.2	29.92	41.92	44.72	59	177
149.7	299.4	29.94	41.94	44.74	59	177
149.8	299.6	29.96	41.96	44.76	59	177
149.9	299.8	29.98	41.98	44.78	59	177
150	300	30	42	44.8	59	177
150.1	300.2	30.02	42.02	44.82	59	177
150.2	300.4	30.04	42.04	44.84	59	177
150.3	300.6	30.06	42.06	44.86	59	177
150.4	300.8	30.08	42.08	44.88	59	177
150.5	301	30.1	42.1	44.9	59	177
150.6	301.2	30.12	42.12	44.92	59	177
150.7	301.4	30.14	42.14	44.94	59	177
150.8	301.6	30.16	42.16	44.96	59	177
150.9	301.8	30.18	42.18	44.98	59	177
151	302	30.2	42.2	45	59	177
151.1	302.2	30.22	42.22	45.02	59	177
151.2	302.4	30.24	42.24	45.04	59	177
151.3	302.6	30.26	42.26	45.06	59	177
151.4	302.8	30.28	42.28	45.08	59	177
151.5	303	30.3	42.3	45.1	59	177
151.6	303.2	30.32	42.32	45.12	59	177
151.7	303.4	30.34	42.34	45.14	59	177
151.8	303.6	30.36	42.36	45.16	59	177
151.9	303.8	30.38	42.38	45.18	59	177
152	304	30.4	42.4	45.2	59	177
152.1	304.2	30.42	42.42	45.22	59	177
152.2	304.4	30.44	42.44	45.24	59	177
152.3	304.6	30.46	42.46	45.26	59	177
152.4	304.8	30.48	42.48	45.28	59	177
152.5	305	30.5	42.5	45.3	59	177
152.6	305.2	30.52	42.52	45.32	59	177
152.7	305.4	30.54	42.54	45.34	59	177
152.8	305.6	30.56	42.56	45.36	59	177
152.9	305.8	30.58	42.58	45.38	59	177
153	306	30.6	42.6	45.4	59	177
153.1	306.2	30.62	42.62	45.42	59	177
153.2	306.4	30.64	42.64	45.44	59	177
153.3	306.6	30.66	42.66	45.46	59	177
153.4	306.8	30.68	42.68	45.48	60	180
153.5	307	30.7	42.7	45.5	60	180
153.6	307.2	30.72	42.72	45.52	60	180
153.7	307.4	30.74	42.74	45.54	60	180
153.8	307.6	30.76	42.76	45.56	60	180
153.9	307.8	30.78	42.78	45.58	60	180
154	308	30.8	42.8	45.6	60	180
154.1	308.2	30.82	42.82	45.62	60	180
154.2	308.4	30.84	42.84	45.64	60	180
154.3	308.6	30.86	42.86	45.66	60	180
154.4	308.8	30.88	42.88	45.68	60	180
154.5	309	30.9	42.9	45.7	60	180
154.6	309.2	30.92	42.92	45.72	60	180
154.7	309.4	30.94	42.94	45.74	60	180
154.8	309.6	30.96	42.96	45.76	60	180
154.9	309.8	30.98	42.98	45.78	60	180
155	310	31	43	45.8	61	183
155.1	310.2	31.02	43.02	45.82	61	183
155.2	310.4	31.04	43.04	45.84	64	192
155.3	310.6	31.06	43.06	45.86	64	192
155.4	310.8	31.08	43.08	45.88	64	192
155.5	311	31.1	43.1	45.9	64	192
155.6	311.2	31.12	43.12	45.92	64	192
155.7	311.4	31.14	43.14	45.94	64	192
155.8	311.6	31.16	43.16	45.96	64	192
155.9	311.8	31.18	43.18	45.98	64	192
156	312	31.2	43.2	46	64	192
156.1	312.2	31.22	43.22	46.02	64	192
156.2	312.4	31.24	43.24	46.04	64	192
156.3	312.6	31.26	43.26	46.06	64	192
156.4	312.8	31.28	43.28	46.08	64	192
156.5	313	31.3	43.3	46.1	64	192
156.6	313.2	31.32	43.32	46.12	64	192
156.7	313.4	31.34	43.34	46.14	64	192
156.8	313.6	31.36	43.36	46.16	64	192
156.9	313.8	31.38	43.38	46.18	64	192
157	314	31.4	43.4	46.2	64	192
157.1	314.2	31.42	43.42	46.22	64	192
157.2	314.4	31.44	43.44	46.24	64	192
157.3	314.6	31.46	43.46	46.26	64	192
157.4	314.8	31.48	43.48	46.28	64	192
157.5	315	31.5	43.5	46.3	64	192
157.6	315.2	31.52	43.52	46.32	64	192
157.7	315.4	31.54	43.54	46.34	64	192
157.8	315.6	31.56	43.56	46.36	64	192
157.9	315.8	31.58	43.58	46.38	64	192
158	316	31.6	43.6	46.4	64	192
158.1	316.2	31.62	43.62	46.42	64	192
158.2	316.4	31.64	43.64	46.44	64	192
158.3	316.6	31.66	43.66	46.46	64	192
158.4	316.8	31.68	43.68	46.48	64	192
158.5	317	31.7	43.7	46.5	64	192
158.6	317.2	31.72	43.72	46.52	64	192
158.7	317.4	31.74	43.74	46.54	64	192
158.8	317.6	31.76	43.76	46.56	64	192
158.9	317.8	31.78	43.78	46.58	64	192
159	318	31.8	43.8	46.6	64	192
159.1	318.2	31.82	43.82	46.62	64	192
159.2	318.4	31.84	43.84	46.64	64	192
159.3	318.6	31.86	43.86	46.66	64	192
159.4	318.8	31.88	43.88	46.68	64	192
159.5	319	31.9	43.9	46.7	64	192
159.6	319.2	31.92	43.92	46.72	64	192
159.7	319.4	31.94	43.94	46.74	64	192
159.8	319.6	31.96	43.96	46.76	64	192
159.9	319.8	31.98	43.98	46.78	64	192
160	320	32	44	46.8	64	192
160.1	320.2	32.02	44.02	46.82	64	192
160.2	320.4	32.04	44.04	46.84	64	192
160.3	320.6	32.06	44.06	46.86	64	192
160.4	320.8	32.08	44.08	46.88	64	192
160.5	321	32.1	44.1	46.9	64	192
160.6	321.2	32.12	44.12	46.92	64	192
160.7	321.4	32.14	44.14	46.94	64	192
160.8	321.6	32.16	44.16	46.96	64	192
160.9	321.8	32.18	44.18	46.98	64	192
161	322	32.2	44.2	47	64	192
161.1	322.2	32.22	44.22	47.02	64	192
161.2	322.4	32.24	44.24	47.04	64	192
161.3	322.6	32.26	44.26	47.06	64	192
161.4	322.8	32.28	44.28	47.08	64	192
161.5	323	32.3	44.3	47.1	64	192
161.6	323.2	32.32	44.32	47.12	64	192
161.7	323.4	32.34	44.34	47.14	64	192
161.8	323.6	32.36	44.36	47.16	64	192
161.9	323.8	32.38	44.38	47.18	64	192
162	324	32.4	44.4	47.2	64	192
162.1	324.2	32.42	44.42	47.22	64	192
162.2	324.4	32.44	44.44	47.24	64	192
162.3	324.6	32.46	44.46	47.26	64	192
162.4	324.8	32.48	44.48	47.28	64	192
162.5	325	32.5	44.5	47.3	64	192
162.6	325.2	32.52	44.52	47.32	64	192
162.7	325.4	32.54	44.54	47.34	64	192
162.8	325.6	32.56	44.56	47.36	64	192
162.9	325.8	32.58	44.58	47.38	64	192
163	326	32.6	44.6	47.4	64	192
163.1	326.2	32.62	44.62	47.42	64	192
163.2	326.4	32.64	44.64	47.44	64	192
163.3	326.6	32.66	44.66	47.46	64	192
163.4	326.8	32.68	44.68	47.48	64	192
163.5	327	32.7	44.7	47.5	64	192
163.6	327.2	32.72	44.72	47.52	64	192
163.7	327.4	32.74	44.74	47.54	64	192
163.8	327.6	32.76	44.76	47.56	64	192
163.9	327.8	32.78	44.78	47.58	64	192
164	328	32.8	44.8	47.6	64	192
164.1	328.2	32.82	44.82	47.62	64	192
164.2	328.4	32.84	44.84	47.64	64	192
164.3	328.6	32.86	44.86	47.66	64	192
164.4	328.8	32.88	44.88	47.68	64	192
164.5	329	32.9	44.9	47.7	64	192
164.6	329.2	32.92	44.92	47.72	64	192
164.7	329.4	32.94	44.94	47.74	64	192
164.8	329.6	32.96	44.96	47.76	64	192
164.9	329.8	32.98	44.98	47.78	64	192
165	330	33	45	47.8	64	192
165.1	330.2	33.02	45.02	47.82	64	192
165.2	330.4	33.04	45.04	47.84	64	192
165.3	330.6	33.06	45.06	47.86	64	192
165.4	330.8	33.08	45.08	47.88	64	192
165.5	331	33.1	45.1	47.9	68	204
165.6	331.2	33.12	45.12	47.92	68	204
165.7	331.4	33.14	45.14	47.94	68	204
165.8	331.6	33.16	45.16	47.96	68	204
165.9	331.8	33.18	45.18	47.98	68	204
166	332	33.2	45.2	48	68	204
166.1	332.2	33.22	45.22	48.02	68	204
166.2	332.4	33.24	45.24	48.04	68	204
166.3	332.6	33.26	45.26	48.06	68	204
166.4	332.8	33.28	45.28	48.08	68	204
166.5	333	33.3	45.3	48.1	68	204
166.6	333.2	33.32	45.32	48.12	68	204
166.7	333.4	33.34	45.34	48.14	68	204
166.8	333.6	33.36	45.36	48.16	68	204
166.9	333.8	33.38	45.38	48.18	68	204
167	334	33.4	45.4	48.2	68	204
167.1	334.2	33.42	45.42	48.22	68	204
167.2	334.4	33.44	45.44	48.24	68	204
167.3	334.6	33.46	45.46	48.26	68	204
167.4	334.8	33.48	45.48	48.28	68	204
167.5	335	33.5	45.5	48.3	68	204
167.6	335.2	33.52	45.52	48.32	68	204
167.7	335.4	33.54	45.54	48.34	68	204
167.8	335.6	33.56	45.56	48.36	68	204
167.9	335.8	33.58	45.58	48.38	68	204
168	336	33.6	45.6	48.4	68	204
168.1	336.2	33.62	45.62	48.42	68	204
168.2	336.4	33.64	45.64	48.44	68	204
168.3	336.6	33.66	45.66	48.46	68	204
168.4	336.8	33.68	45.68	48.48	68	204
168.5	337	33.7	45.7	48.5	68	204
168.6	337.2	33.72	45.72	48.52	68	204
168.7	337.4	33.74	45.74	48.54	68	204
168.8	337.6	33.76	45.76	48.56	68	204
168.9	337.8	33.78	45.78	48.58	68	204
169	338	33.8	45.8	48.6	68	204
169.1	338.2	33.82	45.82	48.62	68	204
169.2	338.4	33.84	45.84	48.64	68	204
169.3	338.6	33.86	45.86	48.66	68	204
169.4	338.8	33.88	45.88	48.68	68	204
169.5	339	33.9	45.9	48.7	68	204
169.6	339.2	33.92	45.92	48.72	68	204
169.7	339.4	33.94	45.94	48.74	68	204
169.8	339.6	33.96	45.96	48.76	68	204
169.9	339.8	33.98	45.98	48.78	69	207
170	340	34	46	48.8	69	207
170.1	340.2	34.02	46.02	48.82	69	207
170.2	340.4	34.04	46.04	48.84	69	207
170.3	340.6	34.06	46.06	48.86	69	207
170.4	340.8	34.08	46.08	48.88	69	207
170.5	341	34.1	46.1	48.9	69	207
170.6	341.2	34.12	46.12	48.92	69	207
170.7	341.4	34.14	46.14	48.94	69	207
170.8	341.6	34.16	46.16	48.96	69	207
170.9	341.8	34.18	46.18	48.98	69	207
171	342	34.2	46.2	49	69	207
171.1	342.2	34.22	46.22	49.02	69	207
171.2	342.4	34.24	46.24	49.04	69	207
171.3	342.6	34.26	46.26	49.06	69	207
171.4	342.8	34.28	46.28	49.08	69	207
171.5	343	34.3	46.3	49.1	69	207
171.6	343.2	34.32	46.32	49.12	69	207
171.7	343.4	34.34	46.34	49.14	69	207
171.8	343.6	34.36	46.36	49.16	69	207
171.9	343.8	34.38	46.38	49.18	69	207
172	344	34.4	46.4	49.2	69	207
172.1	344.2	34.42	46.42	49.22	69	207
172.2	344.4	34.44	46.44	49.24	69	207
172.3	344.6	34.46	46.46	49.26	69	207
172.4	344.8	34.48	46.48	49.28	69	207
172.5	345	34.5	46.5	49.3	69	207
172.6	345.2	34.52	46.52	49.32	69	207
172.7	345.4	34.54	46.54	49.34	69	207
172.8	345.6	34.56	46.56	49.36	69	207
172.9	345.8	34.58	46.58	49.38	69	207
173	346	34.6	46.6	49.4	69	207
173.1	346.2	34.62	46.62	49.42	69	207
173.2	346.4	34.64	46.64	49.44	69	207
173.3	346.6	34.66	46.66	49.46	69	207
173.4	346.8	34.68	46.68	49.48	69	207
173.5	347	34.7	46.7	49.5	69	207
173.6	347.2	34.72	46.72	49.52	69	207
173.7	347.4	34.74	46.74	49.54	69	207
173.8	347.6	34.76	46.76	49.56	69	207
173.9	347.8	34.78	46.78	49.58	75	225
174	348	34.8	46.8	49.6	75	225
174.1	348.2	34.82	46.82	49.62	75	225
174.2	348.4	34.84	46.84	49.64	75	225
174.3	348.6	34.86	46.86	49.66	75	225
174.4	348.8	34.88	46.88	49.68	75	225
174.5	349	34.9	46.9	49.7	75	225
174.6	349.2	34.92	46.92	49.72	75	225
174.7	349.4	34.94	46.94	49.74	75	225
174.8	349.6	34.96	46.96	49.76	75	225
174.9	349.8	34.98	46.98	49.78	75	225
175	350	35	47	49.8	75	225
175.1	350.2	35.02	47.02	49.82	76	228
175.2	350.4	35.04	47.04	49.84	76	228
175.3	350.6	35.06	47.06	49.86	76	228
175.4	350.8	35.08	47.08	49.88	76	228
175.5	351	35.1	47.1	49.9	76	228
175.6	351.2	35.12	47.12	49.92	76	228
175.7	351.4	35.14	47.14	49.94	76	228
175.8	351.6	35.16	47.16	49.96	76	228
175.9	351.8	35.18	47.18	49.98	76	228
176	352	35.2	47.2	50	76	228
176.1	352.2	35.22	47.22	50.02	76	228
176.2	352.4	35.24	47.24	50.04	76	228
176.3	352.6	35.26	47.26	50.06	78	234
176.4	352.8	35.28	47.28	50.08	78	234
176.5	353	35.3	47.3	50.1	78	234
176.6	353.2	35.32	47.32	50.12	78	234
176.7	353.4	35.34	47.34	50.14	78	234
176.8	353.6	35.36	47.36	50.16	78	234
176.9	353.8	35.38	47.38	50.18	78	234
177	354	35.4	47.4	50.2	78	234
177.1	354.2	35.42	47.42	50.22	78	234
177.2	354.4	35.44	47.44	50.24	78	234
177.3	354.6	35.46	47.46	50.26	78	234
177.4	354.8	35.48	47.48	50.28	78	234
177.5	355	35.5	47.5	50.3	78	234
177.6	355.2	35.52	47.52	50.32	78	234
177.7	355.4	35.54	47.54	50.34	78	234
177.8	355.6	35.56	47.56	50.36	78	234
177.9	355.8	35.58	47.58	50.38	78	234
178	356	35.6	47.6	50.4	78	234
178.1	356.2	35.62	47.62	50.42	78	234
178.2	356.4	35.64	47.64	50.44	78	234
178.3	356.6	35.66	47.66	50.46	78	234
178.4	356.8	35.68	47.68	50.48	78	234
178.5	357	35.7	47.7	50.5	78	234
178.6	357.2	35.72	47.72	50.52	78	234
178.7	357.4	35.74	47.74	50.54	78	234
178.8	357.6	35.76	47.76	50.56	78	234
178.9	357.8	35.78	47.78	50.58	78	234
179	358	35.8	47.8	50.6	78	234
179.1	358.2	35.82	47.82	50.62	78	234
179.2	358.4	35.84	47.84	50.64	78	234
179.3	358.6	35.86	47.86	50.66	78	234
179.4	358.8	35.88	47.88	50.68	78	234
179.5	359	35.9	47.9	50.7	78	234
179.6	359.2	35.92	47.92	50.72	78	234
179.7	359.4	35.94	47.94	50.74	78	234
179.8	359.6	35.96	47.96	50.76	78	234
179.9	359.8	35.98	47.98	50.78	78	234
180	360	36	48	50.8	78	234
180.1	360.2	36.02	48.02	50.82	78	234
180.2	360.4	36.04	48.04	50.84	78	234
180.3	360.6	36.06	48.06	50.86	78	234
180.4	360.8	36.08	48.08	50.88	78	234
180.5	361	36.1	48.1	50.9	78	234
180.6	361.2	36.12	48.12	50.92	78	234
180.7	361.4	36.14	48.14	50.94	78	234
180.8	361.6	36.16	48.16	50.96	78	234
180.9	361.8	36.18	48.18	50.98	78	234
181	362	36.2	48.2	51	78	234
181.1	362.2	36.22	48.22	51.02	78	234
181.2	362.4	36.24	48.24	51.04	78	234
181.3	362.6	36.26	48.26	51.06	78	234
181.4	362.8	36.28	48.28	51.08	78	234
181.5	363	36.3	48.3	51.1	78	234
181.6	363.2	36.32	48.32	51.12	78	234
181.7	363.4	36.34	48.34	51.14	78	234
181.8	363.6	36.36	48.36	51.16	78	234
181.9	363.8	36.38	48.38	51.18	78	234
182	364	36.4	48.4	51.2	78	234
182.1	364.2	36.42	48.42	51.22	78	234
182.2	364.4	36.44	48.44	51.24	78	234
182.3	364.6	36.46	48.46	51.26	78	234
182.4	364.8	36.48	48.48	51.28	78	234
182.5	365	36.5	48.5	51.3	82	246
182.6	365.2	36.52	48.52	51.32	82	246
182.7	365.4	36.54	48.54	51.34	82	246
182.8	365.6	36.56	48.56	51.36	82	246
182.9	365.8	36.58	48.58	51.38	82	246
183	366	36.6	48.6	51.4	82	246
183.1	366.2	36.62	48.62	51.42	82	246
183.2	366.4	36.64	48.64	51.44	82	246
183.3	366.6	36.66	48.66	51.46	82	246
183.4	366.8	36.68	48.68	51.48	82	246
183.5	367	36.7	48.7	51.5	82	246
183.6	367.2	36.72	48.72	51.52	82	246
183.7	367.4	36.74	48.74	51.54	82	246
183.8	367.6	36.76	48.76	51.56	82	246
183.9	367.8	36.78	48.78	51.58	82	246
184	368	36.8	48.8	51.6	82	246
184.1	368.2	36.82	48.82	51.62	82	246
184.2	368.4	36.84	48.84	51.64	82	246
184.3	368.6	36.86	48.86	51.66	82	246
184.4	368.8	36.88	48.88	51.68	82	246
184.5	369	36.9	48.9	51.7	82	246
184.6	369.2	36.92	48.92	51.72	82	246
184.7	369.4	36.94	48.94	51.74	82	246
184.8	369.6	36.96	48.96	51.76	82	246
184.9	369.8	36.98	48.98	51.78	82	246
185	370	37	49	51.8	82	246
185.1	370.2	37.02	49.02	51.82	82	246
185.2	370.4	37.04	49.04	51.84	82	246
185.3	370.6	37.06	49.06	51.86	82	246
185.4	370.8	37.08	49.08	51.88	82	246
185.5	371	37.1	49.1	51.9	82	246
185.6	371.2	37.12	49.12	51.92	82	246
185.7	371.4	37.14	49.14	51.94	82	246
185.8	371.6	37.16	49.16	51.96	82	246
185.9	371.8	37.18	49.18	51.98	82	246
186	372	37.2	49.2	52	82	246
186.1	372.2	37.22	49.22	52.02	82	246
186.2	372.4	37.24	49.24	52.04	82	246
186.3	372.6	37.26	49.26	52.06	82	246
186.4	372.8	37.28	49.28	52.08	82	246
186.5	373	37.3	49.3	52.1	82	246
186.6	373.2	37.32	49.32	52.12	82	246
186.7	373.4	37.34	49.34	52.14	82	246
186.8	373.6	37.36	49.36	52.16	82	246
186.9	373.8	37.38	49.38	52.18	82	246
187	374	37.4	49.4	52.2	82	246
187.1	374.2	37.42	49.42	52.22	82	246
187.2	374.4	37.44	49.44	52.24	82	246
187.3	374.6	37.46	49.46	52.26	82	246
187.4	374.8	37.48	49.48	52.28	82	246
187.5	375	37.5	49.5	52.3	82	246
187.6	375.2	37.52	49.52	52.32	82	246
187.7	375.4	37.54	49.54	52.34	82	246
187.8	375.6	37.56	49.56	52.36	82	246
187.9	375.8	37.58	49.58	52.38	82	246
188	376	37.6	49.6	52.4	82	246
188.1	376.2	37.62	49.62	52.42	82	246
188.2	376.4	37.64	49.64	52.44	82	246
188.3	376.6	37.66	49.66	52.46	82	246
188.4	376.8	37.68	49.68	52.48	82	246
188.5	377	37.7	49.7	52.5	82	246
188.6	377.2	37.72	49.72	52.52	82	246
188.7	377.4	37.74	49.74	52.54	82	246
188.8	377.6	37.76	49.76	52.56	82	246
188.9	377.8	37.78	49.78	52.58	82	246
189	378	37.8	49.8	52.6	82	246
189.1	378.2	37.82	49.82	52.62	82	246
189.2	378.4	37.84	49.84	52.64	82	246
189.3	378.6	37.86	49.86	52.66	82	246
189.4	378.8	37.88	49.88	52.68	82	246
189.5	379	37.9	49.9	52.7	82	246
189.6	379.2	37.92	49.92	52.72	82	246
189.7	379.4	37.94	49.94	52.74	82	246
189.8	379.6	37.96	49.96	52.76	82	246
189.9	379.8	37.98	49.98	52.78	82	246
190	380	38	50	52.8	82	246
190.1	380.2	38.02	50.02	52.82	82	246
190.2	380.4	38.04	50.04	52.84	82	246
190.3	380.6	38.06	50.06	52.86	82	246
190.4	380.8	38.08	50.08	52.88	88	264
190.5	381	38.1	50.1	52.9	88	264
190.6	381.2	38.12	50.12	52.92	88	264
190.7	381.4	38.14	50.14	52.94	88	264
190.8	381.6	38.16	50.16	52.96	88	264
190.9	381.8	38.18	50.18	52.98	88	264
191	382	38.2	50.2	53	88	264
191.1	382.2	38.22	50.22	53.02	88	264
191.2	382.4	38.24	50.24	53.04	88	264
191.3	382.6	38.26	50.26	53.06	88	264
191.4	382.8	38.28	50.28	53.08	88	264
191.5	383	38.3	50.3	53.1	88	264
191.6	383.2	38.32	50.32	53.12	88	264
191.7	383.4	38.34	50.34	53.14	88	264
191.8	383.6	38.36	50.36	53.16	88	264
191.9	383.8	38.38	50.38	53.18	88	264
192	384	38.4	50.4	53.2	88	264
192.1	384.2	38.42	50.42	53.22	88	264
192.2	384.4	38.44	50.44	53.24	88	264
192.3	384.6	38.46	50.46	53.26	88	264
192.4	384.8	38.48	50.48	53.28	88	264
192.5	385	38.5	50.5	53.3	88	264
192.6	385.2	38.52	50.52	53.32	88	264
192.7	385.4	38.54	50.54	53.34	88	264
192.8	385.6	38.56	50.56	53.36	88	264
192.9	385.8	38.58	50.58	53.38	88	264
193	386	38.6	50.6	53.4	88	264
193.1	386.2	38.62	50.62	53.42	88	264
193.2	386.4	38.64	50.64	53.44	88	264
193.3	386.6	38.66	50.66	53.46	88	264
193.4	386.8	38.68	50.68	53.48	88	264
193.5	387	38.7	50.7	53.5	88	264
193.6	387.2	38.72	50.72	53.52	88	264
193.7	387.4	38.74	50.74	53.54	88	264
193.8	387.6	38.76	50.76	53.56	88	264
193.9	387.8	38.78	50.78	53.58	88	264
194	388	38.8	50.8	53.6	88	264
194.1	388.2	38.82	50.82	53.62	92	276
194.2	388.4	38.84	50.84	53.64	92	276
194.3	388.6	38.86	50.86	53.66	92	276
194.4	388.8	38.88	50.88	53.68	92	276
194.5	389	38.9	50.9	53.7	92	276
194.6	389.2	38.92	50.92	53.72	92	276
194.7	389.4	38.94	50.94	53.74	92	276
194.8	389.6	38.96	50.96	53.76	92	276
194.9	389.8	38.98	50.98	53.78	92	276
195	390	39	51	53.8	92	276
195.1	390.2	39.02	51.02	53.82	92	276
195.2	390.4	39.04	51.04	53.84	92	276
195.3	390.6	39.06	51.06	53.86	92	276
195.4	390.8	39.08	51.08	53.88	92	276
195.5	391	39.1	51.1	53.9	92	276
195.6	391.2	39.12	51.12	53.92	92	276
195.7	391.4	39.14	51.14	53.94	98	294
195.8	391.6	39.16	51.16	53.96	98	294
195.9	391.8	39.18	51.18	53.98	98	294
196	392	39.2	51.2	54	98	294
196.1	392.2	39.22	51.22	54.02	98	294
196.2	392.4	39.24	51.24	54.04	98	294
196.3	392.6	39.26	51.26	54.06	98	294
196.4	392.8	39.28	51.28	54.08	98	294
196.5	393	39.3	51.3	54.1	98	294
196.6	393.2	39.32	51.32	54.12	98	294
196.7	393.4	39.34	51.34	54.14	98	294
196.8	393.6	39.36	51.36	54.16	98	294
196.9	393.8	39.38	51.38	54.18	98	294
197	394	39.4	51.4	54.2	98	294
197.1	394.2	39.42	51.42	54.22	98	294
197.2	394.4	39.44	51.44	54.24	98	294
197.3	394.6	39.46	51.46	54.26	98	294
197.4	394.8	39.48	51.48	54.28	98	294
197.5	395	39.5	51.5	54.3	98	294
197.6	395.2	39.52	51.52	54.32	98	294
197.7	395.4	39.54	51.54	54.34	98	294
197.8	395.6	39.56	51.56	54.36	98	294
197.9	395.8	39.58	51.58	54.38	98	294
198	396	39.6	51.6	54.4	98	294
198.1	396.2	39.62	51.62	54.42	98	294
198.2	396.4	39.64	51.64	54.44	98	294
198.3	396.6	39.66	51.66	54.46	98	294
198.4	396.8	39.68	51.68	54.48	98	294
198.5	397	39.7	51.7	54.5	99	297
198.6	397.2	39.72	51.72	54.52	99	297
198.7	397.4	39.74	51.74	54.54	99	297
198.8	397.6	39.76	51.76	54.56	99	297
198.9	397.8	39.78	51.78	54.58	99	297
199	398	39.8	51.8	54.6	99	297
199.1	398.2	39.82	51.82	54.62	99	297
199.2	398.4	39.84	51.84	54.64	99	297
199.3	398.6	39.86	51.86	54.66	99	297
199.4	398.8	39.88	51.88	54.68	99	297
199.5	399	39.9	51.9	54.7	99	297
199.6	399.2	39.92	51.92	54.72	99	297
199.7	399.4	39.94	51.94	54.74	99	297
199.8	399.6	39.96	51.96	54.76	99	297
199.9	399.8	39.98	51.98	54.78	99	297
200	400	40	52	54.8	99	297
200.1	400.2	40.02	52.02	54.82	99	297
200.2	400.4	40.04	52.04	54.84	99	297
200.3	400.6	40.06	52.06	54.86	99	297
200.4	400.8	40.08	52.08	54.88	99	297
200.5	401	40.1	52.1	54.9	99	297
200.6	401.2	40.12	52.12	54.92	99	297
200.7	401.4	40.14	52.14	54.94	99	297
200.8	401.6	40.16	52.16	54.96	99	297
200.9	401.8	40.18	52.18	54.98	99	297
201	402	40.2	52.2	55	99	297
201.1	402.2	40.22	52.22	55.02	99	297
201.2	402.4	40.24	52.24	55.04	99	297
201.3	402.6	40.26	52.26	55.06	99	297
201.4	402.8	40.28	52.28	55.08	99	297
201.5	403	40.3	52.3	55.1	99	297
201.6	403.2	40.32	52.32	55.12	99	297
201.7	403.4	40.34	52.34	55.14	99	297
201.8	403.6	40.36	52.36	55.16	99	297
201.9	403.8	40.38	52.38	55.18	99	297
202	404	40.4	52.4	55.2	99	297
202.1	404.2	40.42	52.42	55.22	105	315
202.2	404.4	40.44	52.44	55.24	105	315
202.3	404.6	40.46	52.46	55.26	105	315
202.4	404.8	40.48	52.48	55.28	105	315
202.5	405	40.5	52.5	55.3	105	315
202.6	405.2	40.52	52.52	55.32	105	315
202.7	405.4	40.54	52.54	55.34	105	315
202.8	405.6	40.56	52.56	55.36	105	315
202.9	405.8	40.58	52.58	55.38	105	315
203	406	40.6	52.6	55.4	105	315
203.1	406.2	40.62	52.62	55.42	105	315
203.2	406.4	40.64	52.64	55.44	105	315
203.3	406.6	40.66	52.66	55.46	105	315
203.4	406.8	40.68	52.68	55.48	105	315
203.5	407	40.7	52.7	55.5	106	318
203.6	407.2	40.72	52.72	55.52	106	318
203.7	407.4	40.74	52.74	55.54	106	318
203.8	407.6	40.76	52.76	55.56	106	318
203.9	407.8	40.78	52.78	55.58	106	318
204	408	40.8	52.8	55.6	106	318
204.1	408.2	40.82	52.82	55.62	106	318
204.2	408.4	40.84	52.84	55.64	106	318
204.3	408.6	40.86	52.86	55.66	106	318
204.4	408.8	40.88	52.88	55.68	106	318
204.5	409	40.9	52.9	55.7	106	318
204.6	409.2	40.92	52.92	55.72	106	318
204.7	409.4	40.94	52.94	55.74	106	318
204.8	409.6	40.96	52.96	55.76	106	318
204.9	409.8	40.98	52.98	55.78	108	324
205	410	41	53	55.8	108	324
205.1	410.2	41.02	53.02	55.82	108	324
205.2	410.4	41.04	53.04	55.84	108	324
205.3	410.6	41.06	53.06	55.86	108	324
205.4	410.8	41.08	53.08	55.88	108	324
205.5	411	41.1	53.1	55.9	108	324
205.6	411.2	41.12	53.12	55.92	108	324
205.7	411.4	41.14	53.14	55.94	108	324
205.8	411.6	41.16	53.16	55.96	108	324
205.9	411.8	41.18	53.18	55.98	108	324
206	412	41.2	53.2	56	108	324
206.1	412.2	41.22	53.22	56.02	108	324
206.2	412.4	41.24	53.24	56.04	108	324
206.3	412.6	41.26	53.26	56.06	108	324
206.4	412.8	41.28	53.28	56.08	108	324
206.5	413	41.3	53.3	56.1	108	324
206.6	413.2	41.32	53.32	56.12	108	324
206.7	413.4	41.34	53.34	56.14	108	324
206.8	413.6	41.36	53.36	56.16	108	324
206.9	413.8	41.38	53.38	56.18	108	324
207	414	41.4	53.4	56.2	108	324
207.1	414.2	41.42	53.42	56.22	108	324
207.2	414.4	41.44	53.44	56.24	108	324
207.3	414.6	41.46	53.46	56.26	108	324
207.4	414.8	41.48	53.48	56.28	108	324
207.5	415	41.5	53.5	56.3	108	324
207.6	415.2	41.52	53.52	56.32	108	324
207.7	415.4	41.54	53.54	56.34	108	324
207.8	415.6	41.56	53.56	56.36	108	324
207.9	415.8	41.58	53.58	56.38	108	324
208	416	41.6	53.6	56.4	108	324
208.1	416.2	41.62	53.62	56.42	108	324
208.2	416.4	41.64	53.64	56.44	108	324
208.3	416.6	41.66	53.66	56.46	108	324
208.4	416.8	41.68	53.68	56.48	108	324
208.5	417	41.7	53.7	56.5	108	324
208.6	417.2	41.72	53.72	56.52	108	324
208.7	417.4	41.74	53.74	56.54	108	324
208.8	417.6	41.76	53.76	56.56	108	324
208.9	417.8	41.78	53.78	56.58	108	324
209	418	41.8	53.8	56.6	108	324
209.1	418.2	41.82	53.82	56.62	108	324
209.2	418.4	41.84	53.84	56.64	108	324
209.3	418.6	41.86	53.86	56.66	108	324
209.4	418.8	41.88	53.88	56.68	108	324
209.5	419	41.9	53.9	56.7	108	324
209.6	419.2	41.92	53.92	56.72	108	324
209.7	419.4	41.94	53.94	56.74	108	324
209.8	419.6	41.96	53.96	56.76	108	324
209.9	419.8	41.98	53.98	56.78	108	324
210	420	42	54	56.8	108	324
210.1	420.2	42.02	54.02	56.82	108	324
210.2	420.4	42.04	54.04	56.84	108	324
210.3	420.6	42.06	54.06	56.86	108	324
210.4	420.8	42.08	54.08	56.88	108	324
210.5	421	42.1	54.1	56.9	108	324
210.6	421.2	42.12	54.12	56.92	108	324
210.7	421.4	42.14	54.14	56.94	112	336
210.8	421.6	42.16	54.16	56.96	112	336
210.9	421.8	42.18	54.18	56.98	112	336
211	422	42.2	54.2	57	112	336
211.1	422.2	42.22	54.22	57.02	112	336
211.2	422.4	42.24	54.24	57.04	112	336
211.3	422.6	42.26	54.26	57.06	112	336
211.4	422.8	42.28	54.28	57.08	112	336
211.5	423	42.3	54.3	57.1	112	336
211.6	423.2	42.32	54.32	57.12	112	336
211.7	423.4	42.34	54.34	57.14	112	336
211.8	423.6	42.36	54.36	57.16	112	336
211.9	423.8	42.38	54.38	57.18	112	336
212	424	42.4	54.4	57.2	112	336
212.1	424.2	42.42	54.42	57.22	112	336
212.2	424.4	42.44	54.44	57.24	112	336
212.3	424.6	42.46	54.46	57.26	112	336
212.4	424.8	42.48	54.48	57.28	112	336
212.5	425	42.5	54.5	57.3	112	336
212.6	425.2	42.52	54.52	57.32	112	336
212.7	425.4	42.54	54.54	57.34	112	336
212.8	425.6	42.56	54.56	57.36	112	336
212.9	425.8	42.58	54.58	57.38	112	336
213	426	42.6	54.6	57.4	112	336
213.1	426.2	42.62	54.62	57.42	112	336
213.2	426.4	42.64	54.64	57.44	112	336
213.3	426.6	42.66	54.66	57.46	112	336
213.4	426.8	42.68	54.68	57.48	112	336
213.5	427	42.7	54.7	57.5	112	336
213.6	427.2	42.72	54.72	57.52	112	336
213.7	427.4	42.74	54.74	57.54	112	336
213.8	427.6	42.76	54.76	57.56	112	336
213.9	427.8	42.78	54.78	57.58	112	336
214	428	42.8	54.8	57.6	112	336
214.1	428.2	42.82	54.82	57.62	112	336
214.2	428.4	42.84	54.84	57.64	112	336
214.3	428.6	42.86	54.86	57.66	112	336
214.4	428.8	42.88	54.88	57.68	112	336
214.5	429	42.9	54.9	57.7	112	336
214.6	429.2	42.92	54.92	57.72	112	336
214.7	429.4	42.94	54.94	57.74	112	336
214.8	429.6	42.96	54.96	57.76	112	336
214.9	429.8	42.98	54.98	57.78	112	336
215	430	43	55	57.8	112	336
215.1	430.2	43.02	55.02	57.82	112	336
215.2	430.4	43.04	55.04	57.84	112	336
215.3	430.6	43.06	55.06	57.86	112	336
215.4	430.8	43.08	55.08	57.88	112	336
215.5	431	43.1	55.1	57.9	112	336
215.6	431.2	43.12	55.12	57.92	112	336
215.7	431.4	43.14	55.14	57.94	112	336
215.8	431.6	43.16	55.16	57.96	112	336
215.9	431.8	43.18	55.18	57.98	112	336
216	432	43.2	55.2	58	112	336
216.1	432.2	43.22	55.22	58.02	112	336
216.2	432.4	43.24	55.24	58.04	112	336
216.3	432.6	43.26	55.26	58.06	112	336
216.4	432.8	43.28	55.28	58.08	112	336
216.5	433	43.3	55.3	58.1	112	336
216.6	433.2	43.32	55.32	58.12	112	336
216.7	433.4	43.34	55.34	58.14	112	336
216.8	433.6	43.36	55.36	58.16	112	336
216.9	433.8	43.38	55.38	58.18	112	336
217	434	43.4	55.4	58.2	112	336
217.1	434.2	43.42	55.42	58.22	112	336
217.2	434.4	43.44	55.44	58.24	112	336
217.3	434.6	43.46	55.46	58.26	112	336
217.4	434.8	43.48	55.48	58.28	112	336
217.5	435	43.5	55.5	58.3	112	336
217.6	435.2	43.52	55.52	58.32	112	336
217.7	435.4	43.54	55.54	58.34	112	336
217.8	435.6	43.56	55.56	58.36	112	336
217.9	435.8	43.58	55.58	58.38	112	336
218	436	43.6	55.6	58.4	112	336
218.1	436.2	43.62	55.62	58.42	112	336
218.2	436.4	43.64	55.64	58.44	112	336
218.3	436.6	43.66	55.66	58.46	112	336
218.4	436.8	43.68	55.68	58.48	112	336
218.5	437	43.7	55.7	58.5	112	336
218.6	437.2	43.72	55.72	58.52	112	336
218.7	437.4	43.74	55.74	58.54	112	336
218.8	437.6	43.76	55.76	58.56	112	336
218.9	437.8	43.78	55.78	58.58	118	354
219	438	43.8	55.8	58.6	118	354
219.1	438.2	43.82	55.82	58.62	118	354
219.2	438.4	43.84	55.84	58.64	118	354
219.3	438.6	43.86	55.86	58.66	118	354
219.4	438.8	43.88	55.88	58.68	118	354
219.5	439	43.9	55.9	58.7	118	354
219.6	439.2	43.92	55.92	58.72	118	354
219.7	439.4	43.94	55.94	58.74	118	354
219.8	439.6	43.96	55.96	58.76	118	354
219.9	439.8	43.98	55.98	58.78	118	354
220	440	44	56	58.8	118	354
220.1	440.2	44.02	56.02	58.82	118	354
220.2	440.4	44.04	56.04	58.84	118	354
220.3	440.6	44.06	56.06	58.86	118	354
220.4	440.8	44.08	56.08	58.88	118	354
220.5	441	44.1	56.1	58.9	118	354
220.6	441.2	44.12	56.12	58.92	118	354
220.7	441.4	44.14	56.14	58.94	118	354
220.8	441.6	44.16	56.16	58.96	118	354
220.9	441.8	44.18	56.18	58.98	118	354
221	442	44.2	56.2	59	118	354
221.1	442.2	44.22	56.22	59.02	118	354
221.2	442.4	44.24	56.24	59.04	118	354
221.3	442.6	44.26	56.26	59.06	118	354
221.4	442.8	44.28	56.28	59.08	118	354
221.5	443	44.3	56.3	59.1	118	354
221.6	443.2	44.32	56.32	59.12	118	354
221.7	443.4	44.34	56.34	59.14	118	354
221.8	443.6	44.36	56.36	59.16	118	354
221.9	443.8	44.38	56.38	59.18	118	354
222	444	44.4	56.4	59.2	118	354
222.1	444.2	44.42	56.42	59.22	118	354
222.2	444.4	44.44	56.44	59.24	118	354
222.3	444.6	44.46	56.46	59.26	118	354
222.4	444.8	44.48	56.48	59.28	118	354
222.5	445	44.5	56.5	59.3	118	354
222.6	445.2	44.52	56.52	59.32	118	354
222.7	445.4	44.54	56.54	59.34	122	366
222.8	445.6	44.56	56.56	59.36	122	366
222.9	445.8	44.58	56.58	59.38	122	366
223	446	44.6	56.6	59.4	122	366
223.1	446.2	44.62	56.62	59.42	122	366
223.2	446.4	44.64	56.64	59.44	122	366
223.3	446.6	44.66	56.66	59.46	122	366
223.4	446.8	44.68	56.68	59.48	122	366
223.5	447	44.7	56.7	59.5	122	366
223.6	447.2	44.72	56.72	59.52	122	366
223.7	447.4	44.74	56.74	59.54	122	366
223.8	447.6	44.76	56.76	59.56	122	366
223.9	447.8	44.78	56.78	59.58	122	366
224	448	44.8	56.8	59.6	122	366
224.1	448.2	44.82	56.82	59.62	122	366
224.2	448.4	44.84	56.84	59.64	122	366
224.3	448.6	44.86	56.86	59.66	122	366
224.4	448.8	44.88	56.88	59.68	122	366
224.5	449	44.9	56.9	59.7	122	366
224.6	449.2	44.92	56.92	59.72	122	366
224.7	449.4	44.94	56.94	59.74	122	366
224.8	449.6	44.96	56.96	59.76	122	366
224.9	449.8	44.98	56.98	59.78	122	366
225	450	45	57	59.8	122	366
225.1	450.2	45.02	57.02	59.82	122	366
225.2	450.4	45.04	57.04	59.84	122	366
225.3	450.6	45.06	57.06	59.86	122	366
225.4	450.8	45.08	57.08	59.88	122	366
225.5	451	45.1	57.1	59.9	122	366
225.6	451.2	45.12	57.12	59.92	122	366
225.7	451.4	45.14	57.14	59.94	122	366
225.8	451.6	45.16	57.16	59.96	122	366
225.9	451.8	45.18	57.18	59.98	122	366
226	452	45.2	57.2	60	122	366
226.1	452.2	45.22	57.22	60.02	122	366
226.2	452.4	45.24	57.24	60.04	122	366
226.3	452.6	45.26	57.26	60.06	122	366
226.4	452.8	45.28	57.28	60.08	122	366
226.5	453	45.3	57.3	60.1	122	366
226.6	453.2	45.32	57.32	60.12	122	366
226.7	453.4	45.34	57.34	60.14	134	402
226.8	453.6	45.36	57.36	60.16	134	402
226.9	453.8	45.38	57.38	60.18	134	402
227	454	45.4	57.4	60.2	134	402
227.1	454.2	45.42	57.42	60.22	134	402
227.2	454.4	45.44	57.44	60.24	135	405
227.3	454.6	45.46	57.46	60.26	135	405
227.4	454.8	45.48	57.48	60.28	141	423
227.5	455	45.5	57.5	60.3	141	423
227.6	455.2	45.52	57.52	60.32	141	423
227.7	455.4	45.54	57.54	60.34	141	423
227.8	455.6	45.56	57.56	60.36	141	423
227.9	455.8	45.58	57.58	60.38	141	423
228	456	45.6	57.6	60.4	141	423
228.1	456.2	45.62	57.62	60.42	141	423
228.2	456.4	45.64	57.64	60.44	146	438
228.3	456.6	45.66	57.66	60.46	146	438
228.4	456.8	45.68	57.68	60.48	146	438
228.5	457	45.7	57.7	60.5	146	438
228.6	457.2	45.72	57.72	60.52	146	438
228.7	457.4	45.74	57.74	60.54	146	438
228.8	457.6	45.76	57.76	60.56	146	438
228.9	457.8	45.78	57.78	60.58	146	438
229	458	45.8	57.8	60.6	146	438
229.1	458.2	45.82	57.82	60.62	146	438
229.2	458.4	45.84	57.84	60.64	146	438
229.3	458.6	45.86	57.86	60.66	146	438
229.4	458.8	45.88	57.88	60.68	146	438
229.5	459	45.9	57.9	60.7	146	438
229.6	459.2	45.92	57.92	60.72	146	438
229.7	459.4	45.94	57.94	60.74	146	438
229.8	459.6	45.96	57.96	60.76	146	438
229.9	459.8	45.98	57.98	60.78	146	438
230	460	46	58	60.8	146	438
230.1	460.2	46.02	58.02	60.82	146	438
230.2	460.4	46.04	58.04	60.84	146	438
230.3	460.6	46.06	58.06	60.86	146	438
230.4	460.8	46.08	58.08	60.88	146	438
230.5	461	46.1	58.1	60.9	146	438
230.6	461.2	46.12	58.12	60.92	146	438
230.7	461.4	46.14	58.14	60.94	146	438
230.8	461.6	46.16	58.16	60.96	146	438
230.9	461.8	46.18	58.18	60.98	146	438
231	462	46.2	58.2	61	146	438
231.1	462.2	46.22	58.22	61.02	146	438
231.2	462.4	46.24	58.24	61.04	146	438
231.3	462.6	46.26	58.26	61.06	146	438
231.4	462.8	46.28	58.28	61.08	146	438
231.5	463	46.3	58.3	61.1	146	438
231.6	463.2	46.32	58.32	61.12	146	438
231.7	463.4	46.34	58.34	61.14	146	438
231.8	463.6	46.36	58.36	61.16	146	438
231.9	463.8	46.38	58.38	61.18	147	441
232	464	46.4	58.4	61.2	147	441
232.1	464.2	46.42	58.42	61.22	147	441
232.2	464.4	46.44	58.44	61.24	147	441
232.3	464.6	46.46	58.46	61.26	147	441
232.4	464.8	46.48	58.48	61.28	147	441
232.5	465	46.5	58.5	61.3	147	441
232.6	465.2	46.52	58.52	61.32	147	441
232.7	465.4	46.54	58.54	61.34	147	441
232.8	465.6	46.56	58.56	61.36	147	441
232.9	465.8	46.58	58.58	61.38	147	441
233	466	46.6	58.6	61.4	147	441
233.1	466.2	46.62	58.62	61.42	147	441
233.2	466.4	46.64	58.64	61.44	147	441
233.3	466.6	46.66	58.66	61.46	147	441
233.4	466.8	46.68	58.68	61.48	147	441
233.5	467	46.7	58.7	61.5	149	447
233.6	467.2	46.72	58.72	61.52	150	450
233.7	467.4	46.74	58.74	61.54	150	450
233.8	467.6	46.76	58.76	61.56	150	450
233.9	467.8	46.78	58.78	61.58	150	450
234	468	46.8	58.8	61.6	150	450
234.1	468.2	46.82	58.82	61.62	150	450
234.2	468.4	46.84	58.84	61.64	150	450
234.3	468.6	46.86	58.86	61.66	150	450
234.4	468.8	46.88	58.88	61.68	150	450
234.5	469	46.9	58.9	61.7	150	450
234.6	469.2	46.92	58.92	61.72	150	450
234.7	469.4	46.94	58.94	61.74	150	450
234.8	469.6	46.96	58.96	61.76	150	450
234.9	469.8	46.98	58.98	61.78	150	450
235	470	47	59	61.8	150	450
235.1	470.2	47.02	59.02	61.82	150	450
235.2	470.4	47.04	59.04	61.84	150	450
235.3	470.6	47.06	59.06	61.86	150	450
235.4	470.8	47.08	59.08	61.88	150	450
235.5	471	47.1	59.1	61.9	150	450
235.6	471.2	47.12	59.12	61.92	150	450
235.7	471.4	47.14	59.14	61.94	150	450
235.8	471.6	47.16	59.16	61.96	150	450
235.9	471.8	47.18	59.18	61.98	150	450
236	472	47.2	59.2	62	150	450
236.1	472.2	47.22	59.22	62.02	150	450
236.2	472.4	47.24	59.24	62.04	150	450
236.3	472.6	47.26	59.26	62.06	150	450
236.4	472.8	47.28	59.28	62.08	150	450
236.5	473	47.3	59.3	62.1	150	450
236.6	473.2	47.32	59.32	62.12	150	450
236.7	473.4	47.34	59.34	62.14	150	450
236.8	473.6	47.36	59.36	62.16	150	450
236.9	473.8	47.38	59.38	62.18	150	450
237	474	47.4	59.4	62.2	150	450
237.1	474.2	47.42	59.42	62.22	150	450
237.2	474.4	47.44	59.44	62.24	151	453
237.3	474.6	47.46	59.46	62.26	151	453
237.4	474.8	47.48	59.48	62.28	151	453
237.5	475	47.5	59.5	62.3	151	453
237.6	475.2	47.52	59.52	62.32	151	453
237.7	475.4	47.54	59.54	62.34	151	453
237.8	475.6	47.56	59.56	62.36	151	453
237.9	475.8	47.58	59.58	62.38	151	453
238	476	47.6	59.6	62.4	151	453
238.1	476.2	47.62	59.62	62.42	151	453
238.2	476.4	47.64	59.64	62.44	151	453
238.3	476.6	47.66	59.66	62.46	151	453
238.4	476.8	47.68	59.68	62.48	151	453
238.5	477	47.7	59.7	62.5	151	453
238.6	477.2	47.72	59.72	62.52	151	453
238.7	477.4	47.74	59.74	62.54	151	453
238.8	477.6	47.76	59.76	62.56	151	453
238.9	477.8	47.78	59.78	62.58	151	453
239	478	47.8	59.8	62.6	151	453
239.1	478.2	47.82	59.82	62.62	151	453
239.2	478.4	47.84	59.84	62.64	155	465
239.3	478.6	47.86	59.86	62.66	155	465
239.4	478.8	47.88	59.88	62.68	155	465
239.5	479	47.9	59.9	62.7	155	465
239.6	479.2	47.92	59.92	62.72	155	465
239.7	479.4	47.94	59.94	62.74	155	465
239.8	479.6	47.96	59.96	62.76	155	465
239.9	479.8	47.98	59.98	62.78	155	465
240	480	48	60	62.8	155	465
240.1	480.2	48.02	60.02	62.82	155	465
240.2	480.4	48.04	60.04	62.84	155	465
240.3	480.6	48.06	60.06	62.86	155	465
240.4	480.8	48.08	60.08	62.88	155	465
240.5	481	48.1	60.1	62.9	155	465
240.6	481.2	48.12	60.12	62.92	155	465
240.7	481.4	48.14	60.14	62.94	155	465
240.8	481.6	48.16	60.16	62.96	155	465
240.9	481.8	48.18	60.18	62.98	155	465
241	482	48.2	60.2	63	155	465
241.1	482.2	48.22	60.22	63.02	155	465
241.2	482.4	48.24	60.24	63.04	155	465
241.3	482.6	48.26	60.26	63.06	155	465
241.4	482.8	48.28	60.28	63.08	155	465
241.5	483	48.3	60.3	63.1	155	465
241.6	483.2	48.32	60.32	63.12	155	465
241.7	483.4	48.34	60.34	63.14	155	465
241.8	483.6	48.36	60.36	63.16	155	465
241.9	483.8	48.38	60.38	63.18	155	465
242	484	48.4	60.4	63.2	155	465
242.1	484.2	48.42	60.42	63.22	155	465
242.2	484.4	48.44	60.44	63.24	155	465
242.3	484.6	48.46	60.46	63.26	155	465
242.4	484.8	48.48	60.48	63.28	155	465
242.5	485	48.5	60.5	63.3	155	465
242.6	485.2	48.52	60.52	63.32	155	465
242.7	485.4	48.54	60.54	63.34	155	465
242.8	485.6	48.56	60.56	63.36	155	465
242.9	485.8	48.58	60.58	63.38	155	465
243	486	48.6	60.6	63.4	155	465
243.1	486.2	48.62	60.62	63.42	155	465
243.2	486.4	48.64	60.64	63.44	155	465
243.3	486.6	48.66	60.66	63.46	155	465
243.4	486.8	48.68	60.68	63.48	155	465
243.5	487	48.7	60.7	63.5	155	465
243.6	487.2	48.72	60.72	63.52	161	483
243.7	487.4	48.74	60.74	63.54	161	483
243.8	487.6	48.76	60.76	63.56	161	483
243.9	487.8	48.78	60.78	63.58	161	483
244	488	48.8	60.8	63.6	161	483
244.1	488.2	48.82	60.82	63.62	161	483
244.2	488.4	48.84	60.84	63.64	161	483
244.3	488.6	48.86	60.86	63.66	161	483
244.4	488.8	48.88	60.88	63.68	161	483
244.5	489	48.9	60.9	63.7	161	483
244.6	489.2	48.92	60.92	63.72	161	483
244.7	489.4	48.94	60.94	63.74	161	483
244.8	489.6	48.96	60.96	63.76	161	483
244.9	489.8	48.98	60.98	63.78	160	480
245	490	49	61	63.8	160	480
245.1	490.2	49.02	61.02	63.82	160	480
245.2	490.4	49.04	61.04	63.84	160	480
245.3	490.6	49.06	61.06	63.86	160	480
245.4	490.8	49.08	61.08	63.88	160	480
245.5	491	49.1	61.1	63.9	160	480
245.6	491.2	49.12	61.12	63.92	160	480
245.7	491.4	49.14	61.14	63.94	160	480
245.8	491.6	49.16	61.16	63.96	160	480
245.9	491.8	49.18	61.18	63.98	160	480
246	492	49.2	61.2	64	160	480
246.1	492.2	49.22	61.22	64.02	160	480
246.2	492.4	49.24	61.24	64.04	160	480
246.3	492.6	49.26	61.26	64.06	160	480
246.4	492.8	49.28	61.28	64.08	160	480
246.5	493	49.3	61.3	64.1	160	480
246.6	493.2	49.32	61.32	64.12	160	480
246.7	493.4	49.34	61.34	64.14	160	480
246.8	493.6	49.36	61.36	64.16	160	480
246.9	493.8	49.38	61.38	64.18	160	480
247	494	49.4	61.4	64.2	160	480
247.1	494.2	49.42	61.42	64.22	160	480
247.2	494.4	49.44	61.44	64.24	160	480
247.3	494.6	49.46	61.46	64.26	160	480
247.4	494.8	49.48	61.48	64.28	160	480
247.5	495	49.5	61.5	64.3	160	480
247.6	495.2	49.52	61.52	64.32	160	480
247.7	495.4	49.54	61.54	64.34	160	480
247.8	495.6	49.56	61.56	64.36	160	480
247.9	495.8	49.58	61.58	64.38	160	480
248	496	49.6	61.6	64.4	160	480
248.1	496.2	49.62	61.62	64.42	160	480
248.2	496.4	49.64	61.64	64.44	160	480
248.3	496.6	49.66	61.66	64.46	160	480
248.4	496.8	49.68	61.68	64.48	160	480
248.5	497	49.7	61.7	64.5	160	480
248.6	497.2	49.72	61.72	64.52	160	480
248.7	497.4	49.74	61.74	64.54	160	480
248.8	497.6	49.76	61.76	64.56	160	480
248.9	497.8	49.78	61.78	64.58	160	480
249	498	49.8	61.8	64.6	160	480
249.1	498.2	49.82	61.82	64.62	160	480
249.2	498.4	49.84	61.84	64.64	160	480
249.3	498.6	49.86	61.86	64.66	160	480
249.4	498.8	49.88	61.88	64.68	165	495
249.5	499	49.9	61.9	64.7	165	495
249.6	499.2	49.92	61.92	64.72	165	495
249.7	499.4	49.94	61.94	64.74	165	495
249.8	499.6	49.96	61.96	64.76	165	495
[truncated: 8,094 more rows]
